# Supplementary material
Source: PubMed Central journal article supplement (PMC7607493)
Supplement: jamapediatr-e203541-s001.pdf [file jamapediatr-e203541-s001.pdf]

## Supplementary Online Content

Fraguas D, Díaz-Caneja CM, Ayora M, et al. Assessment of School Anti-Bullying Interventions: A Meta-Analysis of Randomized Clinical Trials. *JAMA Pediatrics*. Published online November 2, 2020. doi:10.1001/jamapediatrics.2020.3541

**eTable 1.** PRISMA Checklist

**eTable 2.** Classification of Outcome Variables

**eTable 3.** Quality Assessment

**eTable 4.** Characteristics of the Included Studies (Part 1)

**eTable 5.** Characteristics of the Included Studies (Part 2)

**eTable 6.** Meta-analyses of Efficacy of Randomized-Controlled Trials Testing Anti-Bullying School Interventions per Region

**eTable 7.** Population Impact Number of Universal Anti-Bullying School Interventions per Region

**eTable 8.** Meta-analyses of Efficacy of Randomized-Controlled Trials Testing Universal or Targeted Anti-Bullying School Interventions

**eTable 9.** Meta-Regression Analyses (Association Between Variables and Effect Size of Anti-Bullying Interventions)

**eMethods.** Supplemental Methods

**eFigure 1.** PRISMA Flow Diagram of the Systematic Literature Search Strategy

**eFigure 2.** Efficacy of Anti-Bullying Interventions on Overall Bullying at Study Follow-up

**eFigure 3.** Efficacy of Anti-Bullying Interventions on Mental Health Problems at Study Follow-up

**eReferences.**

This supplementary material has been provided by the authors to give readers additional information about their work.

© 2020 American Medical Association. All rights reserved.

| <b>eTable 1. PRISMA Checklist</b> |          |                                                                                                                                                                                                                                                                                                             |                                      |
|-----------------------------------|----------|-------------------------------------------------------------------------------------------------------------------------------------------------------------------------------------------------------------------------------------------------------------------------------------------------------------|--------------------------------------|
| <b>Section/topic</b>              | <b>#</b> | <b>Checklist item</b>                                                                                                                                                                                                                                                                                       | <b>Reported on page #</b>            |
| <b>TITLE</b>                      |          |                                                                                                                                                                                                                                                                                                             |                                      |
| Title                             | 1        | Identify the report as a systematic review, meta-analysis, or both.                                                                                                                                                                                                                                         | Yes, reported on page 1              |
| <b>ABSTRACT</b>                   |          |                                                                                                                                                                                                                                                                                                             |                                      |
| Structured summary                | 2        | Provide a structured summary including, as applicable: background; objectives; data sources; study eligibility criteria, participants, and interventions; study appraisal and synthesis methods; results; limitations; conclusions and implications of key findings; systematic review registration number. | Yes, reported on pages 5-6           |
| <b>INTRODUCTION</b>               |          |                                                                                                                                                                                                                                                                                                             |                                      |
| Rationale                         | 3        | Describe the rationale for the review in the context of what is already known.                                                                                                                                                                                                                              | Yes, reported on page 8              |
| Objectives                        | 4        | Provide an explicit statement of questions being addressed with reference to participants, interventions, comparisons, outcomes, and study design (PICOS).                                                                                                                                                  | Yes, reported on page 8              |
| <b>METHODS</b>                    |          |                                                                                                                                                                                                                                                                                                             |                                      |
| Protocol and registration         | 5        | Indicate if a review protocol exists, if and where it can be accessed (e.g., Web address), and, if available, provide registration information including registration number.                                                                                                                               | There is no review protocol          |
| Eligibility criteria              | 6        | Specify study characteristics (e.g., PICOS, length of follow-up) and report characteristics (e.g., years considered, language,                                                                                                                                                                              | Yes, reported on page 9 and eMethods |

© 2020 American Medical Association. All rights reserved.

|                                           |    |                                                                                                                                                                                                                        |                                          |
|-------------------------------------------|----|------------------------------------------------------------------------------------------------------------------------------------------------------------------------------------------------------------------------|------------------------------------------|
|                                           |    | publication status) used as criteria for eligibility, giving rationale.                                                                                                                                                |                                          |
| <b>Information sources</b>                | 7  | Describe all information sources (e.g., databases with dates of coverage, contact with study authors to identify additional studies) in the search and date last searched.                                             | Yes, reported on page 9                  |
| <b>Search</b>                             | 8  | Present full electronic search strategy for at least one database, including any limits used, such that it could be repeated.                                                                                          | Yes, reported on page 9 and eMethods     |
| <b>Study selection</b>                    | 9  | State the process for selecting studies (i.e., screening, eligibility, included in systematic review, and, if applicable, included in the meta-analysis).                                                              | Yes, reported on page 9 and eMethods     |
| <b>Data collection process</b>            | 10 | Describe method of data extraction from reports (e.g., piloted forms, independently, in duplicate) and any processes for obtaining and confirming data from investigators.                                             | Yes, reported on page 9 and eMethods     |
| <b>Data items</b>                         | 11 | List and define all variables for which data were sought (e.g., PICOS, funding sources) and any assumptions and simplifications made.                                                                                  | Yes, reported on page 10 and eTable 2    |
| <b>Risk of bias in individual studies</b> | 12 | Describe methods used for assessing risk of bias of individual studies (including specification of whether this was done at the study or outcome level), and how this information is to be used in any data synthesis. | Yes, reported on page 11 and eTable 3    |
| <b>Summary measures</b>                   | 13 | State the principal summary measures (e.g., risk ratio, difference in means).                                                                                                                                          | Yes, reported on pages 11-12             |
| <b>Synthesis of results</b>               | 14 | Describe the methods of handling data and combining results of studies, if done, including measures of consistency (e.g., $I^2$ ) for each meta-analysis.                                                              | Yes, reported on pages 11-12 and Table 1 |

## **eMethods. Supplemental Methods**

### **Search strategies: sets of search terms used**

To detect randomized controlled trials (RCTs) of anti-bullying interventions, we first performed a computerized Ovid MEDLINE®, ERIC®, and PsycINFO® database search from inception through February 2020. We used three sets of search terms: 1) ["bullying" OR "peer abuse" OR "abuse" OR "aggression" OR "harassment" OR "perpetrator" OR "victim" OR "victimization" OR "peer violence" OR "violence" OR "cyberbullying" OR "anti-bullying"], 2) AND ["school" OR "peer"], and 3) AND ["intervention" OR "curriculum" OR "prevention" OR "program" OR "resilience" OR "school climate" OR "school-based" OR "therapy" OR "treatment" OR "trial"].

### **Study selection**

Four of us (three psychiatric consultants and one clinical psychologist (MA, MDC, IEB, and RAC) double-screened all papers in three phases, resolving discrepancies through discussion and consensus (including another researcher, a psychiatric consultant, DF).

In phase 1, we screened the titles and abstracts of the retrieved papers. Papers were selected only if, based on title and abstract, they met all of the following inclusion criteria: 1) assessment of bullying at school; 2) assessment of efficacy or effectiveness of an anti-bullying program (to reduce bullying rates or bullying complications); 3) randomized controlled trial design; 4) reporting of results; and 5) published in English. However, if in doubt or if there was insufficient information in the title or abstract, they were selected. The initial literature search yielded 34,798 studies. The manual search identified six additional records. After removing 18,091 duplicates, we evaluated 16,707 potential studies. Of the 16,707 studies, 371 fulfilled all the inclusion criteria and qualified for phase 2.

Phase 2 consisted of a comprehensive review of the full text of the articles. Studies were selected if they met all the following inclusion criteria: 1) they were original studies or letters with original data (editorials, letters without original data, reviews, and meta-analyses were excluded); 2) they were randomized controlled trials; 3) they assessed the efficacy/effectiveness of an anti-bullying intervention (i.e., either the effect of an intervention targeting school and/or individual variables (e.g., school climate, coping skills, etc.) on bullying rates, or the effect of an anti-bullying program or protocol on bullying rates and/or mental health problems); 4) the intervention was performed at school; and 5) they reported results that would allow calculation of effect sizes. Of the 371 studies, 77 qualified for phase 3.

In phase 3, we used the following hierarchical criteria to control for studies with overlapping samples to ensure that only independent samples assessing each outcome category were included in each of the meta-analyses: 1) study with the largest sample and 2) most recent publication. When data from at least three independent studies assessing the effect on the same outcome category were available, we selected the outcome,

and consequently the studies, for meta-analysis. Of the 77 studies, 69 original independent studies met the criteria for inclusion in the final meta-analysis database.

#### **Data extraction**

Six of us (DF, CMDC, MA, MDC, IEB, and RAC) extracted data from each eligible study independently and double-checked them by pairs, with discrepancies resolved via discussion. Data extracted included: year of publication, region (country and city if available) where the study was conducted, name of the intervention program, date of intervention, duration of intervention, duration of follow-up (when applicable), type of randomization (individual or cluster), type of control group, type of school (public or private), primary (age  $\leq 11$ ) versus secondary (age 12-18) education, sample size, number of randomized groups, mean age, age range, and percentage of females (for both intervention and control groups), type of approach (universal or targeted), type of bullying variable (dichotomous or continuous), and statistics to calculate effect sizes for the meta-analyses and meta-regressions.

#### **Classification of outcome variables**

The 69 original independent studies used more than 500 different instruments to assess outcome variables. Three of us (IEB, RAC, and DF) independently classified these instruments into a manageable number of outcome variables, with discrepancies resolved by discussion. This allowed us to consolidate outcome variables into eight categories based on previous meta-analyses: 1) overall bullying (as a pooled measure, including bullying perpetration, bullying exposure, and cyberbullying); 2) traditional bullying perpetration; 3) traditional bullying exposure; 4) cyberbullying (including both perpetration and exposure); 5) attitudes that discourage bullying; 6) attitudes that encourage bullying; 7) mental health problems; and 8) school climate.

Traditional bullying perpetration was defined as “to engage in bullying” (including teasing, rumors, deliberate exclusion/social isolation, and physical threats/violence). Traditional bullying exposure was defined as “being the object of bullying” (including teasing, rumors, deliberate exclusion/social isolation, and physical threats/violence). Cyberbullying was defined as a pooled measure including both cyberbullying perpetration and exposure and was considered a specific form of bullying that involves the use of electronic devices and social media, such as computers, tablets, or mobile telephones to carry out bullying. Attitudes that discourage bullying were defined as social or group positions and beliefs that reject or condemn bullying. Attitudes that encourage bullying were defined as social or group positions and beliefs that promote, favor, tolerate, accept, or excuse bullying. Mental health problems were defined as mental symptoms (e.g., depression, anxiety, or insomnia), suicidality (e.g., suicide ideation, suicide attempt), or loss of wellbeing. School climate was defined as the quality and character of school life, including social characteristics of a school in terms of relationships among students and staff/teachers, learning and teaching emphasis, values and norms, and shared approaches and practices.

### **Potential moderators of effect size estimates for significant meta-analyses**

Study quality, duration of follow-up (interval between end of intervention and assessment, when applicable), year of publication, mean age (>10 years: age cut-off based on a previous meta-analysis),<sup>1</sup> percentage of female participants, sample size of intervention groups, sample size (>1000 participants: cut-off based on previous data),<sup>2</sup> number of randomized intervention groups, duration of intervention (interval from start to end of intervention), duration of follow-up ( $\geq 1$  year), and universal or targeted intervention.

### **Statistical analysis**

We entered data into an electronic database and analyzed it using random-effects meta-analyses with Comprehensive Meta-Analysis (CMA) Software Version 2.0 (Biostat, Inc., Englewood, NJ).<sup>3</sup> Cohen's *d* values were used as estimates of the effect size of each anti-bullying intervention relative to control groups.

We included as outcomes the mean overall differences in change between intervention and control groups. If the score change value was not available for a certain scale or test, we used endpoint and follow-up differences between intervention and control conditions. If a particular study provided data for different specific outcome measures that may be in the same outcome category, these results were pooled to calculate a single summary effect size for each outcome category in each particular sample at each time point. Pooled 95% confidence intervals (CI) were calculated. The magnitude of Cohen's *d* can be interpreted as small (0.2 to 0.5), moderate (0.5 to 0.8), or large (>0.8).<sup>4</sup>

For purposes of this work, positive Cohen's *d* values show that a certain variable increases more in the active intervention group than in the control group during the assessed period, while negative values indicate the opposite. When the pre-post correlation value was not available and could not be calculated, we used an imputed default *r* value of 0.5.<sup>5</sup> Although the bias is notably small for every pre-post correlation imputation strategy scenario,<sup>6</sup> we decided to use an imputation of  $r=0.5$ , since this is a conservative approach.

Based on the known heterogeneity of outcome measures, we expected that the estimates would vary substantially between studies, and we ran random effects models. In the random-effects analysis, each study was weighted by the inverse of its variance and the between-studies variance.<sup>7</sup> In order to explore if particular studies influenced the random weighted mean, we performed an 'influence analysis' to examine the effect of each individual study on the overall estimate by excluding one study at a time.<sup>8</sup>

We assessed statistical heterogeneity through visual inspection of forest plots and using the *Q* statistic (a magnitude of heterogeneity) and the *I*<sup>2</sup> statistic (a measure of the proportion of variance in summary effect size attributable to heterogeneity).<sup>9</sup> *I*<sup>2</sup> values less than 30% were considered an insignificant amount of heterogeneity.<sup>10</sup> We assessed publication bias by visually inspecting funnel plots and using Orwin's fail-safe *N*,<sup>11</sup> with a criterion for a 'trivial' standardized difference in means of 0.1 and a mean standardized difference in means in missing studies of 0. This generated the number of unpublished studies required to move estimates to a non-significant threshold. Furthermore, we used Egger's linear regression method to quantify the bias captured by the funnel plot.<sup>12</sup>

We used meta-regressions with a random effect model with unrestricted maximum likelihood to test effects of potential moderators on effect size estimates (difference between intervention and control groups) for significant meta-analyses. We performed meta-regressions for moderator variables if at least four studies assessing the same predictor and outcome variable were available. Significant meta-regression values were confirmed by excluding one study at a time, and only meta-regressions for which p-values remained significant after this process were considered significant.

Since recent meta-analyses of the efficacy of anti-bullying interventions have reported a significant moderating effect of geographic location,<sup>13</sup> we performed a meta-analytic subgroup analysis by region, classifying studies into three groups: studies conducted in North America (including Canada and the US), in Europe (including European countries and Israel), and in other regions, instead of just including this variable as a potential moderator in the meta-regressions. We conducted additional subgroup meta-analyses of universal and targeted interventions.

Cohen's d values were converted into number needed to treat (NNT) as recommended by Furukawa's method.<sup>14</sup> NNT was used to obtain the population impact number (PIN) of universal (targeting all students, regardless of risk) anti-bullying interventions, as an estimated measure of the impact of the intervention in the population. PIN is defined as “children in the total population for whom one event will be prevented by the intervention”<sup>15</sup> or, simply, how many need to participate in an anti-bullying program to prevent one case of bullying.<sup>16</sup>

We used a false discovery rate (FDR) correction for multiple comparisons (<https://brainder.org/2011/09/05/fdr-corrected-fdr-adjusted-p-values/>). This function computes the FDR threshold for a vector of p-values. The percentage of tolerated false positives was 5% ( $q < 0.05$ ).

**eFigure 1.** PRISMA flow diagram of the systematic literature search strategy

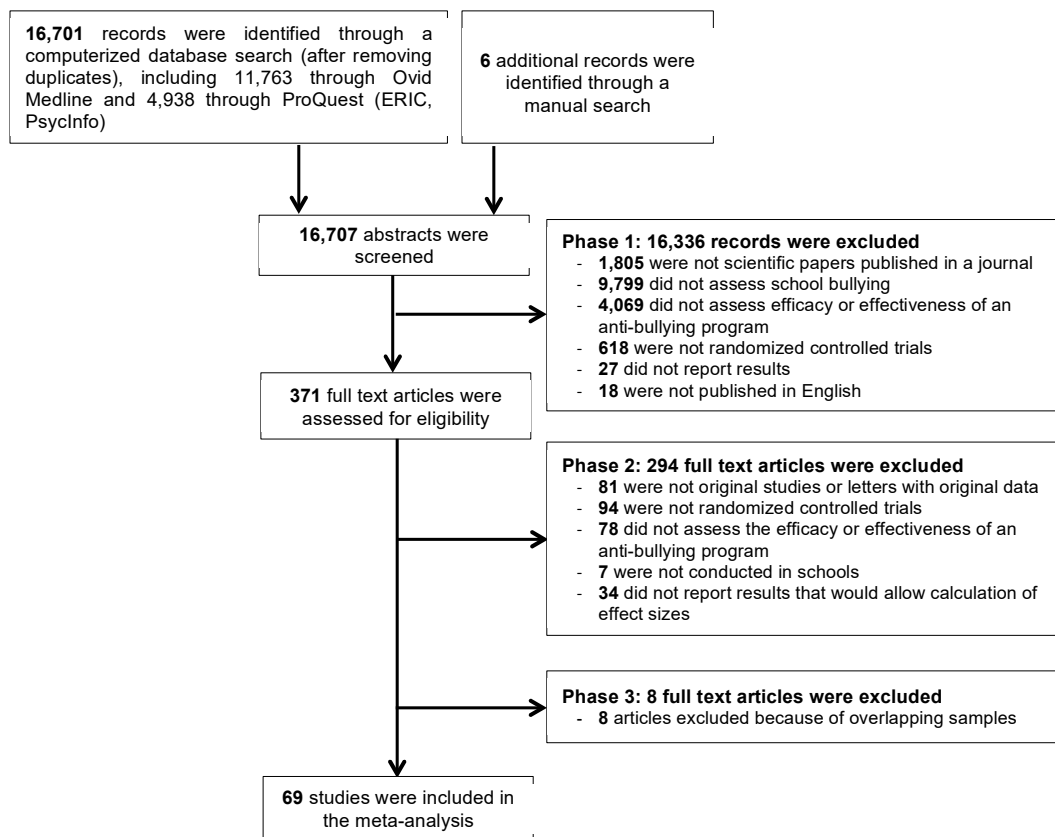



| <b>eTable 2. Classification of outcome variables</b> |                                                                       |                                    |
|------------------------------------------------------|-----------------------------------------------------------------------|------------------------------------|
| <b>STUDY (first author, year)</b>                    | <b>Name of outcome variable</b>                                       | <b>Outcome group</b>               |
| Athanasiades, <sup>17</sup> 2015                     | Tabby checklist-Estimate of cybervictimisation in the next 6 months   | Cyberbullying                      |
| Athanasiades, <sup>17</sup> 2015                     | Tabby checklist-Involvement in cybervictimisation in past 6 months    | Cyberbullying                      |
| Baldry, <sup>18</sup> 2004                           | Sum of different types of bullying                                    | Bullying perpetration              |
| Baldry, <sup>18</sup> 2004                           | Sum of different types of victimization                               | Bullying exposure                  |
| Barkoukis, <sup>65</sup> 2016                        | Basic Empathy Scale total                                             | Attitudes that discourage bullying |
| Barkoukis, <sup>65</sup> 2016                        | Basic Empathy Scale cognitive                                         | Attitudes that discourage bullying |
| Barkoukis, <sup>65</sup> 2016                        | Basic Empathy Scale affective                                         | Attitudes that discourage bullying |
| Barkoukis, <sup>65</sup> 2016                        | Prototype facets (positive)                                           | Attitudes that discourage bullying |
| Bonell, <sup>19</sup> 2018                           | Gatehouse Bullying Scale overall score                                | Bullying exposure                  |
| Bonell, <sup>19</sup> 2018                           | Gatehouse Bullying Scale teasing                                      | Bullying exposure                  |
| Bonell, <sup>19</sup> 2018                           | Gatehouse Bullying Scale rumours                                      | Bullying exposure                  |
| Bonell, <sup>19</sup> 2018                           | Gatehouse Bullying Scale deliberate exclusion                         | Bullying exposure                  |
| Bonell, <sup>19</sup> 2018                           | Gatehouse Bullying Scale threatened or hurt                           | Bullying exposure                  |
| Bonell, <sup>19</sup> 2018                           | Edinburgh study youth transitions and crime overall score             | Bullying perpetration              |
| Bonell, <sup>19</sup> 2018                           | PedsQL overall score                                                  | Mental health problems             |
| Bonell, <sup>19</sup> 2018                           | PedsQL Physical health                                                | Mental health problems             |
| Bonell, <sup>19</sup> 2018                           | PedsQL Psychosocial health                                            | Mental health problems             |
| Bonell, <sup>19</sup> 2018                           | PedsQL Emotional functioning                                          | Mental health problems             |
| Bonell, <sup>19</sup> 2018                           | PedsQL Social functioning                                             | Mental health problems             |
| Bonell, <sup>19</sup> 2018                           | PedsQL School functioning                                             | Mental health problems             |
| Bonell, <sup>19</sup> 2018                           | SDQ total difficulties score                                          | Mental health problems             |
| Bonell, <sup>19</sup> 2018                           | SDQ Emotional problems                                                | Mental health problems             |
| Bonell, <sup>19</sup> 2018                           | SDQ Conduct problems                                                  | Mental health problems             |
| Bonell, <sup>19</sup> 2018                           | SDQ Hyperactivity                                                     | Mental health problems             |
| Bonell, <sup>19</sup> 2018                           | SDQ Peer problems                                                     | Mental health problems             |
| Bonell, <sup>19</sup> 2018                           | SDQ Pro-social strengths                                              | Mental health problems             |
| Bonell, <sup>19</sup> 2018                           | Short Warwick-Edinburgh Mental Well-Being Scale Total wellbeing index | Mental health problems             |

© 2020 American Medical Association. All rights reserved.

|                             |                                                                                                |                                    |
|-----------------------------|------------------------------------------------------------------------------------------------|------------------------------------|
| Bonell, <sup>19</sup> 2018  | Modified aggression scale bullying perpetration                                                | Bullying perpetration              |
| Bonell, <sup>66</sup> 2019  | Student view of school climate overall                                                         | School climate                     |
| Bonell, <sup>66</sup> 2019  | Student view of school climate Student perception of supportive teacher relationships subscale | School climate                     |
| Bonell, <sup>66</sup> 2019  | Student view of school climate Student sense of belonging                                      | School climate                     |
| Bonell, <sup>66</sup> 2019  | Student view of school climate Student perception of participative school environment subscale | School climate                     |
| Bonell, <sup>66</sup> 2019  | Student view of school climate Student commitment to academic values subscale                  | School climate                     |
| Boulton, <sup>20</sup> 1996 | Tendency to bully others                                                                       | Bullying perpetration              |
| Boulton, <sup>20</sup> 1996 | Attitudes towards bullying                                                                     | Attitudes that discourage bullying |
| Boulton, <sup>59</sup> 2017 | Self-blame                                                                                     | Mental health problems             |
| Boulton, <sup>59</sup> 2017 | Self-esteem                                                                                    | Mental health problems             |
| Bowes, <sup>21</sup> 2019   | Global School Based Health measure of bullying                                                 | Bullying exposure                  |
| Bowes, <sup>21</sup> 2019   | Forms of Bullying Scale (Total victimization)                                                  | Bullying exposure                  |
| Bowes, <sup>21</sup> 2019   | Forms of Bullying Scale Verbal victimization                                                   | Bullying exposure                  |
| Bowes, <sup>21</sup> 2019   | Forms of Bullying Scale Threats – victimization                                                | Bullying exposure                  |
| Bowes, <sup>21</sup> 2019   | Forms of Bullying Scale Physical – victimization                                               | Bullying exposure                  |
| Bowes, <sup>21</sup> 2019   | Forms of Bullying Scale Relational – victimization                                             | Bullying exposure                  |
| Bowes, <sup>21</sup> 2019   | Forms of Bullying Scale Social - victimization                                                 | Bullying exposure                  |
| Bowes, <sup>21</sup> 2019   | Forms of Bullying Scale (Total perpetration)                                                   | Bullying perpetration              |
| Bowes, <sup>21</sup> 2019   | Forms of Bullying Scale Verbal perpetration                                                    | Bullying perpetration              |
| Bowes, <sup>21</sup> 2019   | Forms of Bullying Scale Threats – perpetration                                                 | Bullying perpetration              |
| Bowes, <sup>21</sup> 2019   | Forms of Bullying Scale Physical – perpetration                                                | Bullying perpetration              |
| Bowes, <sup>21</sup> 2019   | Forms of Bullying Scale Relational – perpetration                                              | Bullying perpetration              |
| Bowes, <sup>21</sup> 2019   | Forms of Bullying Scale Social – perpetration                                                  | Bullying perpetration              |
| Bowes, <sup>21</sup> 2019   | School climate (total)                                                                         | School climate                     |
| Brown, <sup>22</sup> 2011   | School environment survey school antibullying policies and strategies                          | Attitudes that discourage bullying |
| Brown, <sup>22</sup> 2011   | School environment survey- school bullying intervention                                        | Attitudes that discourage bullying |
| Brown, <sup>22</sup> 2011   | School environment survey- staff bullying intervention                                         | Attitudes that discourage bullying |
| Brown, <sup>22</sup> 2011   | School environment survey-student climate                                                      | School climate                     |
| Brown, <sup>22</sup> 2011   | School environment survey-staff climate                                                        | School climate                     |
| Brown, <sup>22</sup> 2011   | Teacher. Social competency                                                                     | School climate                     |
| Brown, <sup>22</sup> 2011   | Teacher. Physical bullying perpetration                                                        | Bullying perpetration              |
| Brown, <sup>22</sup> 2011   | Teacher. Nonphysical bullying perpetration                                                     | Bullying perpetration              |
| Brown, <sup>22</sup> 2011   | Student. Student support                                                                       | School climate                     |

|                              |                                                                     |                                    |
|------------------------------|---------------------------------------------------------------------|------------------------------------|
| Brown, <sup>22</sup> 2011    | Student. Student attitudes against bullying                         | Attitudes that discourage bullying |
| Brown, <sup>22</sup> 2011    | Student. Student attitudes toward bullying intervention             | Attitudes that discourage bullying |
| Brown, <sup>22</sup> 2011    | Student. Teacher/Staff bullying prevention                          | Attitudes that discourage bullying |
| Brown, <sup>22</sup> 2011    | Student. Student bullying intervention                              | Attitudes that discourage bullying |
| Brown, <sup>22</sup> 2011    | Student. Teacher/staff bullying intervention                        | Attitudes that discourage bullying |
| Brown, <sup>22</sup> 2011    | Student. Positive bystander behavior                                | School climate                     |
| Brown, <sup>22</sup> 2011    | Student. Bullying perpetration                                      | Bullying perpetration              |
| Brown, <sup>22</sup> 2011    | Student. Bullying victimization                                     | Bullying exposure                  |
| Brown, <sup>22</sup> 2011    | Student. Student climate                                            | School climate                     |
| Brown, <sup>22</sup> 2011    | Student. School connectedness                                       | School climate                     |
| Brown, <sup>22</sup> 2011    | Student. Staff climate                                              | School climate                     |
| Calvete, <sup>67</sup> 2019  | Bullying perpetration                                               | Bullying perpetration              |
| Calvete, <sup>67</sup> 2019  | Bullying victimization                                              | Bullying exposure                  |
| Cappella, <sup>68</sup> 2012 | Victimization                                                       | Bullying exposure                  |
| Chen, <sup>69</sup> 2017     | RBIQ Antibullying training vs control                               | Attitudes that discourage bullying |
| Chen, <sup>69</sup> 2017     | RBIQ Definition only vs control                                     | Attitudes that discourage bullying |
| Chen, <sup>69</sup> 2017     | RBIQ Definition and a checklist of three characteristics vs control | Attitudes that discourage bullying |
| Connolly, <sup>23</sup> 2015 | Knowledge bullying                                                  | Bullying perpetration              |
| Connolly, <sup>23</sup> 2015 | Attitudes pro-bullying                                              | Attitudes that encourage bullying  |
| Connolly, <sup>23</sup> 2015 | Victimization bullying                                              | Bullying exposure                  |
| Connolly, <sup>23</sup> 2015 | School connectedness                                                | School climate                     |
| Connolly, <sup>23</sup> 2015 | Anxiety                                                             | Mental health problems             |
| CPPRG, <sup>24</sup> 2010    | Aggressive behavior                                                 | Bullying perpetration              |
| CPPRG, <sup>24</sup> 2010    | Hyperactive-disruptive behavior                                     | Mental health problems             |
| Crean, <sup>25</sup> 2013    | Aggression teacher-report                                           | Bullying perpetration              |
| Crean, <sup>25</sup> 2013    | Aggression self-report                                              | Bullying perpetration              |
| Crean, <sup>25</sup> 2013    | Victimization at school                                             | Bullying exposure                  |
| Cross, <sup>70</sup> 2011    | Bullied every few weeks vs. Less often/Not                          | Bullying perpetration              |
| Cross, <sup>70</sup> 2011    | Bullied vs. Not at all                                              | Bullying perpetration              |
| Cross, <sup>70</sup> 2011    | Bullied others every few weeks vs. Less often/Not                   | Bullying perpetration              |
| Cross, <sup>70</sup> 2011    | Bullied others vs. Not at all                                       | Bullying perpetration              |
| Cross, <sup>70</sup> 2011    | Told no one if bullied vs. Told someone/ wasn't bullied             | Attitudes that discourage bullying |
| Cross, <sup>70</sup> 2011    | Saw someone being bullied/didn't see                                | Bullying perpetration              |

© 2020 American Medical Association. All rights reserved.

|                              |                                       |                                    |
|------------------------------|---------------------------------------|------------------------------------|
| Cross, <sup>26</sup> 2016    | Cybervictimization                    | Cyberbullying                      |
| Cross, <sup>26</sup> 2016    | Cyberperpetration                     | Cyberbullying                      |
| DeRosier, <sup>27</sup> 2004 | Treatment Peer-Report linking         | School climate                     |
| DeRosier, <sup>27</sup> 2004 | Peer-Report dislinking                | School climate                     |
| DeRosier, <sup>27</sup> 2004 | Peer-Report aggression                | Attitudes that encourage bullying  |
| DeRosier, <sup>27</sup> 2004 | Peer-Report victimization             | Bullying exposure                  |
| DeRosier, <sup>27</sup> 2004 | Self-Report self-efficacy             | Attitudes that discourage bullying |
| DeRosier, <sup>27</sup> 2004 | Self-Report outcome expectancy        | Attitudes that discourage bullying |
| DeRosier, <sup>27</sup> 2004 | Self-Report social anxiety            | Mental health problems             |
| DeRosier, <sup>27</sup> 2004 | Self-Report depression                | Mental health problems             |
| DeRosier, <sup>27</sup> 2004 | Self-Report peer rejection            | Mental health problems             |
| DeRosier, <sup>27</sup> 2004 | Self-Report bullying                  | Bullying perpetration              |
| DeRosier, <sup>27</sup> 2004 | Self-Report antisocial affiliates     | Attitudes that encourage bullying  |
| DeRosier, <sup>27</sup> 2004 | Self-Report victimization             | Bullying exposure                  |
| DeRosier, <sup>27</sup> 2004 | Self-Report social withdrawal         | School climate                     |
| DeRosier, <sup>27</sup> 2004 | Self-Report leadership                | Attitudes that discourage bullying |
| DeRosier, <sup>71</sup> 2005 | Treatment Peer-Report linking         | School climate                     |
| DeRosier, <sup>71</sup> 2005 | Peer-Report dislinking                | School climate                     |
| DeRosier, <sup>71</sup> 2005 | Peer-Report aggression                | Attitudes that encourage bullying  |
| DeRosier, <sup>71</sup> 2005 | Peer-Report victimization             | Bullying exposure                  |
| DeRosier, <sup>71</sup> 2005 | Self-Report self-esteem               | Attitudes that discourage bullying |
| DeRosier, <sup>71</sup> 2005 | Self-Report self-efficacy             | Attitudes that discourage bullying |
| DeRosier, <sup>71</sup> 2005 | Self-Report outcome expectancy        | Attitudes that discourage bullying |
| DeRosier, <sup>71</sup> 2005 | Self-Report social anxiety            | Mental health problems             |
| DeRosier, <sup>71</sup> 2005 | Self-Report depression                | Mental health problems             |
| DeRosier, <sup>71</sup> 2005 | Self-Report peer rejection            | Attitudes that encourage bullying  |
| DeRosier, <sup>71</sup> 2005 | Self-Report bullying                  | Bullying perpetration              |
| DeRosier, <sup>71</sup> 2005 | Self-Report antisocial affiliates     | Attitudes that encourage bullying  |
| DeRosier, <sup>71</sup> 2005 | Self-Report victimization             | Bullying exposure                  |
| DeRosier, <sup>71</sup> 2005 | Self-Report social withdrawal         | School climate                     |
| DeRosier, <sup>71</sup> 2005 | Self-Report leadership                | Attitudes that discourage bullying |
| DeSmet, <sup>72</sup> 2018   | Attitudes on comforting the victim    | Attitudes that discourage bullying |
| DeSmet, <sup>72</sup> 2018   | Attitudes on giving the victim advice | Attitudes that discourage bullying |

© 2020 American Medical Association. All rights reserved.

|                              |                                                 |                                    |
|------------------------------|-------------------------------------------------|------------------------------------|
| DeSmet, <sup>72</sup> 2018   | Attitudes on reporting to adults                | Attitudes that discourage bullying |
| DeSmet, <sup>72</sup> 2018   | Attitudes on telling the bully it is not cool   | Attitudes that discourage bullying |
| DeSmet, <sup>72</sup> 2018   | Attitudes on getting back at the bully          | Attitudes that discourage bullying |
| DeSmet, <sup>72</sup> 2018   | Attitudes on doing nothing                      | Attitudes that encourage bullying  |
| DeSmet, <sup>72</sup> 2018   | Moral disengagement attitudes                   | Mental health problems             |
| DeSmet, <sup>72</sup> 2018   | Outcome expectations                            | Mental health problems             |
| DeSmet, <sup>72</sup> 2018   | Low self-efficacy                               | Mental health problems             |
| DeSmet, <sup>72</sup> 2018   | High self-efficacy                              | Mental health problems             |
| DeSmet, <sup>72</sup> 2018   | Subjective norm for positive bystander behavior | Attitudes that discourage bullying |
| DeSmet, <sup>72</sup> 2018   | Inappropriate social skills                     | Mental health problems             |
| DeSmet, <sup>72</sup> 2018   | Appropriate social skills                       | Mental health problems             |
| DeSmet, <sup>72</sup> 2018   | Empathic skills                                 | Mental health problems             |
| DeSmet, <sup>72</sup> 2018   | Behavioral intention positive bystanding        | Attitudes that discourage bullying |
| DeSmet, <sup>72</sup> 2018   | Behavioral intention negative bystanding        | Attitudes that encourage bullying  |
| DeSmet, <sup>72</sup> 2018   | Positive bystander behavior                     | Attitudes that discourage bullying |
| DeSmet, <sup>72</sup> 2018   | Negative bystander behavior                     | Attitudes that encourage bullying  |
| DeSmet, <sup>72</sup> 2018   | Offline bullying victimization                  | Bullying exposure                  |
| DeSmet, <sup>72</sup> 2018   | Offline bullying perpetration                   | Bullying perpetration              |
| DeSmet, <sup>72</sup> 2018   | Cyberbullying victimization                     | Cyberbullying                      |
| DeSmet, <sup>72</sup> 2018   | Cyberbullying perpetration                      | Cyberbullying                      |
| DeSmet, <sup>72</sup> 2018   | Cyberbullying witnessing                        | Cyberbullying                      |
| DeSmet, <sup>72</sup> 2018   | Quality of live and well-being                  | Mental health problems             |
| Espelage, <sup>28</sup> 2013 | Verbal/relational bully perpetration            | Bullying perpetration              |
| Espelage, <sup>28</sup> 2013 | Peer victimization                              | Bullying exposure                  |
| Espelage, <sup>28</sup> 2013 | Physical aggression                             | Bullying perpetration              |
| Espelage, <sup>29</sup> 2015 | Bully perpetration                              | Bullying perpetration              |
| Espelage, <sup>29</sup> 2015 | Bully victimization                             | Bullying exposure                  |
| Espelage, <sup>29</sup> 2015 | Physical aggression                             | Bullying perpetration              |
| Espelage, <sup>60</sup> 2016 | School belonging                                | School climate                     |
| Espelage, <sup>60</sup> 2016 | Empathy                                         | Mental health problems             |
| Espelage, <sup>60</sup> 2016 | Caring                                          | Mental health problems             |
| Espelage, <sup>60</sup> 2016 | Willingness to intervene                        | Attitudes that discourage bullying |
| Farmer, <sup>30</sup> 2017   | Shouted at playtime                             | Bullying exposure                  |

© 2020 American Medical Association. All rights reserved.

|                            |                                                                              |                                    |
|----------------------------|------------------------------------------------------------------------------|------------------------------------|
| Farmer, <sup>30</sup> 2017 | Excluded at playtime                                                         | Bullying exposure                  |
| Farmer, <sup>30</sup> 2017 | Physical bullying                                                            | Bullying perpetration              |
| Farmer, <sup>30</sup> 2017 | Child has happy relations                                                    | Attitudes that discourage bullying |
| Farmer, <sup>30</sup> 2017 | Child has been bullied                                                       | Bullying perpetration              |
| Farmer, <sup>30</sup> 2017 | Parents: child has been bothered/upset by bullying                           | Mental health problems             |
| Farmer, <sup>30</sup> 2017 | Teachers: how often does physical bullying occur?                            | Bullying perpetration              |
| Farmer, <sup>30</sup> 2017 | Teachers: how often does name-calling occur?                                 | Bullying exposure                  |
| Farmer, <sup>30</sup> 2017 | Teachers: how often does deliberate exclusion occur?                         | Bullying exposure                  |
| Farmer, <sup>30</sup> 2017 | Teachers: how often does cruel teasing occur?                                | Bullying exposure                  |
| Farmer, <sup>30</sup> 2017 | Teachers: have you personally noticed bullying occurring in the classroom?   | Bullying perpetration              |
| Farmer, <sup>30</sup> 2017 | Teachers: have you personally noticed bullying occurring at recess or lunch? | Bullying perpetration              |
| Farmer, <sup>30</sup> 2017 | Teachers: the school is a safe place                                         | School climate                     |
| Farmer, <sup>30</sup> 2017 | Teachers: how often do students tell you they have been bullied at school?   | Attitudes that discourage bullying |
| Fekkes, <sup>31</sup> 2006 | Being bullied                                                                | Bullying exposure                  |
| Fekkes, <sup>31</sup> 2006 | Active bullying                                                              | Bullying perpetration              |
| Fekkes, <sup>31</sup> 2006 | Depression                                                                   | Mental health problems             |
| Fekkes, <sup>31</sup> 2006 | Psychosomatic complaints                                                     | Mental health problems             |
| Fekkes, <sup>31</sup> 2006 | Delinquent behavior                                                          | Attitudes that encourage bullying  |
| Fekkes, <sup>31</sup> 2006 | General satisfaction with school life                                        | School climate                     |
| Fekkes, <sup>31</sup> 2006 | Satisfaction with contact with other students                                | School climate                     |
| Fekkes, <sup>31</sup> 2006 | Satisfaction with contact with teachers                                      | School climate                     |
| Fonagy, <sup>32</sup> 2009 | Peer-Report of aggression                                                    | Bullying perpetration              |
| Fonagy, <sup>32</sup> 2009 | Self-Report of aggression                                                    | Bullying perpetration              |
| Fonagy, <sup>32</sup> 2009 | Peer-Report of victimization                                                 | Bullying exposure                  |
| Fonagy, <sup>32</sup> 2009 | Self-Report of victimization                                                 | Bullying exposure                  |
| Fonagy, <sup>32</sup> 2009 | Aggressive bystanding                                                        | Attitudes that encourage bullying  |
| Fonagy, <sup>32</sup> 2009 | Helpful bystanding                                                           | Attitudes that discourage bullying |
| Fonagy, <sup>32</sup> 2009 | Mentalizing                                                                  | Attitudes that discourage bullying |
| Fonagy, <sup>32</sup> 2009 | Aggression is legitimate                                                     | Attitudes that encourage bullying  |
| Frey, <sup>33</sup> 2005   | Student experience acceptance of bullying/aggression                         | Attitudes that encourage bullying  |
| Frey, <sup>33</sup> 2005   | Student experience bystander responsibility                                  | Attitudes that discourage bullying |
| Frey, <sup>33</sup> 2005   | Student experience perceived adult responsiveness                            | Attitudes that discourage bullying |
| Frey, <sup>33</sup> 2005   | Student experience difficulty of responding assertively                      | Attitudes that encourage bullying  |

© 2020 American Medical Association. All rights reserved.

|                                       |                                          |                                    |
|---------------------------------------|------------------------------------------|------------------------------------|
| Frey, <sup>33</sup> 2005              | Student experience direct aggression     | Bullying perpetration              |
| Frey, <sup>33</sup> 2005              | Student experience indirect aggression   | Bullying perpetration              |
| Frey, <sup>33</sup> 2005              | Student experience victimization         | Bullying exposure                  |
| Frey, <sup>33</sup> 2005              | Observer behavior bullying               | Bullying perpetration              |
| Frey, <sup>33</sup> 2005              | Observer behavior encourage bullying     | Attitudes that encourage bullying  |
| Frey, <sup>33</sup> 2005              | Observer behavior target of bullying     | Attitudes that encourage bullying  |
| Frey, <sup>33</sup> 2005              | Observer behavior nonbullying aggression | Attitudes that encourage bullying  |
| Frey, <sup>33</sup> 2005              | Observer behavior agreeable social       | Attitudes that discourage bullying |
| Frey, <sup>33</sup> 2005              | Observer behavior argumentative social   | Attitudes that discourage bullying |
| Frey, <sup>33</sup> 2005              | Teacher-rated interaction skills         | Attitudes that discourage bullying |
| Giannotta, <sup>34</sup> 2009         | Relational victimization                 | Bullying exposure                  |
| Giannotta, <sup>34</sup> 2009         | Overt physical victimization             | Bullying exposure                  |
| Gradinger, <sup>35</sup> 2015         | Cyberbullying                            | Cyberbullying                      |
| Gradinger, <sup>35</sup> 2015         | Cybervictimization                       | Cyberbullying                      |
| Green, <sup>36</sup> 2020             | Bullying knowledge                       | Attitudes that discourage bullying |
| Green, <sup>36</sup> 2020             | Assertiveness                            | Mental health problems             |
| Green, <sup>36</sup> 2020             | Adult responsiveness                     | Mental health problems             |
| Green, <sup>36</sup> 2020             | Bystander responsibility                 | Attitudes that discourage bullying |
| Green, <sup>36</sup> 2020             | Acceptance of bullying                   | Attitudes that encourage bullying  |
| Green, <sup>36</sup> 2020             | Peer victimization                       | Bullying exposure                  |
| Green, <sup>36</sup> 2020             | Bullying perpetration                    | Bullying perpetration              |
| Green, <sup>36</sup> 2020             | Fighting                                 | Bullying perpetration              |
| Gusmões, <sup>37</sup> 2018           | Suffer bullying                          | Bullying exposure                  |
| Gusmões, <sup>37</sup> 2018           | Practice bullying                        | Bullying perpetration              |
| Gusmões, <sup>37</sup> 2018           | Suffer physical violence                 | Bullying exposure                  |
| Gusmões, <sup>37</sup> 2018           | Practice physical violence               | Bullying perpetration              |
| Holen, <sup>38</sup> 2013             | Bullying                                 | Bullying perpetration              |
| Holen, <sup>38</sup> 2013             | SIKS children self concept               | Mental health problems             |
| Holen, <sup>38</sup> 2013             | SIKS children class climate              | School climate                     |
| Holen, <sup>38</sup> 2013             | SIKS children social integration         | School climate                     |
| Hormazábal-Aguayo, <sup>39</sup> 2019 | Bullying physical                        | Bullying perpetration              |
| Hormazábal-Aguayo, <sup>39</sup> 2019 | Bullying verbal                          | Bullying perpetration              |
| Hormazábal-Aguayo, <sup>39</sup> 2019 | Bullying social exclusion                | Bullying perpetration              |

© 2020 American Medical Association. All rights reserved.

|                                    |                                   |                                    |
|------------------------------------|-----------------------------------|------------------------------------|
| Hunt, <sup>40</sup> 2007           | Attitude to victim scale          | Attitudes that discourage bullying |
| Hunt, <sup>40</sup> 2007           | Attitude to bullying scale        | Attitudes that discourage bullying |
| Hunt, <sup>40</sup> 2007           | Prevalence of bullying            | Bullying perpetration              |
| Hunt, <sup>40</sup> 2007           | Experience of being bullied       | Bullying exposure                  |
| Hunt, <sup>40</sup> 2007           | Perceived school safety           | School climate                     |
| Hunt, <sup>40</sup> 2007           | Likelihood of telling somebody    | Attitudes that discourage bullying |
| Hunt, <sup>40</sup> 2007           | Ability to stop others bullying   | Attitudes that discourage bullying |
| Hunt, <sup>40</sup> 2007           | Attempts to stop others bullying  | Attitudes that discourage bullying |
| Hunt, <sup>40</sup> 2007           | Ability to join in bullying       | Attitudes that encourage bullying  |
| Hunt, <sup>40</sup> 2007           | Bullying others with group        | Attitudes that encourage bullying  |
| Hunt, <sup>40</sup> 2007           | Bullying others alone             | Attitudes that encourage bullying  |
| Jenson, <sup>73</sup> 2013         | From bully to uninvolved          | Bullying perpetration              |
| Jenson, <sup>73</sup> 2013         | From bully-victim to uninvolved   | Bullying perpetration              |
| Jenson, <sup>73</sup> 2013         | From uninvolved to uninvolved     | Bullying perpetration              |
| Ju, <sup>41</sup> 2009             | Victimization way to school       | Bullying exposure                  |
| Ju, <sup>41</sup> 2009             | Victimization way from school     | Bullying exposure                  |
| Kaljee, <sup>42</sup> 2017         | Teachers actions to stop bullying | Attitudes that discourage bullying |
| Kaljee, <sup>42</sup> 2017         | Being bullied (physical)          | Bullying exposure                  |
| Kaljee, <sup>42</sup> 2017         | Being bullied (emotional)         | Bullying exposure                  |
| Kaljee, <sup>42</sup> 2017         | Bullying others (physical)        | Bullying perpetration              |
| Kaljee, <sup>42</sup> 2017         | Bullying others (emotional)       | Bullying perpetration              |
| Karasimopoulou, <sup>74</sup> 2012 | Social acceptance (bullying)      | Attitudes that encourage bullying  |
| Kärnä, <sup>43</sup> 2011          | Self-Reported victimization       | Bullying exposure                  |
| Kärnä, <sup>43</sup> 2011          | Self-Reported bullying            | Bullying perpetration              |
| Kärnä, <sup>43</sup> 2011          | Peer-Reported victimization       | Bullying exposure                  |
| Kärnä, <sup>43</sup> 2011          | Peer-Reported bullying            | Bullying perpetration              |
| Kärnä, <sup>43</sup> 2011          | Peer-Reported assisting           | Attitudes that encourage bullying  |
| Kärnä, <sup>43</sup> 2011          | Peer-Reported reinforcing         | Attitudes that encourage bullying  |
| Kärnä, <sup>43</sup> 2011          | Peer-Reported defending           | Attitudes that discourage bullying |
| Kärnä, <sup>43</sup> 2011          | Antibullying attitudes            | Attitudes that discourage bullying |
| Kärnä, <sup>43</sup> 2011          | Empathy towards victims           | Attitudes that discourage bullying |
| Kärnä, <sup>43</sup> 2011          | Self-efficacy for defending       | Attitudes that discourage bullying |
| Kärnä, <sup>43</sup> 2011          | Well-being at school              | Mental health problems             |

© 2020 American Medical Association. All rights reserved.



|                                     |                                              |                                    |
|-------------------------------------|----------------------------------------------|------------------------------------|
| Kärnä, <sup>44</sup> 2013           | Self report victimization                    | Bullying exposure                  |
| Kärnä, <sup>44</sup> 2013           | Self report bullying                         | Bullying perpetration              |
| Kärnä, <sup>44</sup> 2013           | Peer report victimization                    | Bullying exposure                  |
| Kärnä, <sup>44</sup> 2013           | Peer report bullying                         | Bullying perpetration              |
| Kärnä, <sup>44</sup> 2013           | Peer report assisting                        | Attitudes that encourage bullying  |
| Kärnä, <sup>44</sup> 2013           | Peer report reinforcing                      | Attitudes that encourage bullying  |
| Kärnä, <sup>44</sup> 2013           | Peer report defending                        | Attitudes that discourage bullying |
| Kathard, <sup>75</sup> 2014         | SROM - Attitudes toward children who stutter | Attitudes that encourage bullying  |
| Knowler, <sup>45</sup> 2013         | Victimization rating                         | Bullying exposure                  |
| Knowler, <sup>45</sup> 2013         | Trait emotional intelligence                 | Attitudes that discourage bullying |
| Knowler, <sup>45</sup> 2013         | Adjustment SDQ total difficulties            | Mental health problems             |
| Knowler, <sup>45</sup> 2013         | Adjustment SDQ pro-social behavior           | Attitudes that discourage bullying |
| Mallick, <sup>61</sup> 2018         | SROM Total                                   | Mental health problems             |
| Mallick, <sup>61</sup> 2018         | SROM PSD                                     | Mental health problems             |
| Mallick, <sup>61</sup> 2018         | SROM SP                                      | Mental health problems             |
| Mallick, <sup>61</sup> 2018         | SROM VI                                      | Mental health problems             |
| Meraviglia, <sup>46</sup> 2003      | Knowledge of bullying students               | Bullying perpetration              |
| Meraviglia, <sup>46</sup> 2003      | Knowledge of bullying Staff members          | Bullying perpetration              |
| Meyer, <sup>76</sup> 2000           | Peer report School treatment-control         | Bullying perpetration              |
| Midthassel, <sup>47</sup> 2008      | Bullying frequency                           | Bullying perpetration              |
| Midthassel, <sup>47</sup> 2008      | Victimization frequency                      | Bullying exposure                  |
| Moore, <sup>62</sup> 2018           | SDQ Total difficulties                       | Mental health problems             |
| Moore, <sup>62</sup> 2018           | CYRM Total resilience                        | Mental health problems             |
| Moore, <sup>62</sup> 2018           | SEQ-C Total self-efficacy                    | Mental health problems             |
| Muñoz-Fernández, <sup>77</sup> 2019 | Moderate physical aggression                 | Bullying perpetration              |
| Muñoz-Fernández, <sup>77</sup> 2019 | Moderate physical victimization              | Bullying exposure                  |
| Muñoz-Fernández, <sup>77</sup> 2019 | Severe physical aggression                   | Bullying perpetration              |
| Muñoz-Fernández, <sup>77</sup> 2019 | Severe physical victimization                | Bullying exposure                  |
| Muñoz-Fernández, <sup>77</sup> 2019 | Sexual aggression                            | Bullying perpetration              |
| Muñoz-Fernández, <sup>77</sup> 2019 | Sexual victimization                         | Bullying exposure                  |
| Muñoz-Fernández, <sup>77</sup> 2019 | Bullying aggression                          | Bullying perpetration              |
| Muñoz-Fernández, <sup>77</sup> 2019 | Bullying victimization                       | Bullying exposure                  |
| Naidoo, <sup>78</sup> 2016          | Knowledge of verbal bullying                 | Attitudes that discourage bullying |

© 2020 American Medical Association. All rights reserved.

|                               |                                                       |                                    |
|-------------------------------|-------------------------------------------------------|------------------------------------|
| Naidoo, <sup>78</sup> 2016    | Cues about verbal bullying                            | Attitudes that discourage bullying |
| Naidoo, <sup>78</sup> 2016    | Attitudes against verbal bullying                     | Attitudes that discourage bullying |
| Naidoo, <sup>78</sup> 2016    | Attitudes preventing verbal bullying                  | Attitudes that discourage bullying |
| Naidoo, <sup>78</sup> 2016    | Social norms preventing verbal bullying               | Attitudes that discourage bullying |
| Naidoo, <sup>78</sup> 2016    | Social support preventing verbal bullying behavior    | Attitudes that discourage bullying |
| Naidoo, <sup>78</sup> 2016    | Modeling behavior preventing verbal bullying          | Attitudes that discourage bullying |
| Naidoo, <sup>78</sup> 2016    | Regular self-efficacy preventing verbal bullying      | Attitudes that discourage bullying |
| Naidoo, <sup>78</sup> 2016    | Situational self- efficacy preventing verbal bullying | Attitudes that discourage bullying |
| Naidoo, <sup>78</sup> 2016    | Intentions to not verbally bully                      | Attitudes that discourage bullying |
| Naidoo, <sup>78</sup> 2016    | Having an action plan against verbal bullying         | Attitudes that discourage bullying |
| Naidoo, <sup>78</sup> 2016    | Having an action skill against verbal bullying        | Attitudes that discourage bullying |
| Naidoo, <sup>78</sup> 2016    | Having an action goal against verbal bullying         | Attitudes that discourage bullying |
| Naidoo, <sup>78</sup> 2016    | Experienced verbal bullying in the past month         | Bullying exposure                  |
| Naidoo, <sup>78</sup> 2016    | Verbally bullied people in the past month             | Bullying perpetration              |
| Nieh, <sup>79</sup> 2018      | Game only bullying knowledge                          | Attitudes that discourage bullying |
| Nieh, <sup>79</sup> 2018      | Game only bullying attitude                           | Attitudes that discourage bullying |
| Nieh, <sup>79</sup> 2018      | Game only empathy                                     | Mental health problems             |
| Nieh, <sup>79</sup> 2018      | Game only intention to defend                         | Attitudes that discourage bullying |
| Nieh, <sup>79</sup> 2018      | Game only teachers bullying attitude                  | Attitudes that discourage bullying |
| Nieh, <sup>79</sup> 2018      | Game + debriefing bullying knowledge                  | Attitudes that discourage bullying |
| Nieh, <sup>79</sup> 2018      | Game + debriefing bullying attitude                   | Attitudes that discourage bullying |
| Nieh, <sup>79</sup> 2018      | Game + debriefing empathy                             | Mental health problems             |
| Nieh, <sup>79</sup> 2018      | Game + debriefing intention to defend                 | Attitudes that discourage bullying |
| Nieh, <sup>79</sup> 2018      | Game + debriefing teachers bullying attitude          | Attitudes that discourage bullying |
| Nocentini, <sup>48</sup> 2016 | Victimization                                         | Bullying exposure                  |
| Nocentini, <sup>48</sup> 2016 | Bullying                                              | Bullying perpetration              |
| Nocentini, <sup>48</sup> 2016 | Pro-bullying                                          | Attitudes that encourage bullying  |
| Nocentini, <sup>48</sup> 2016 | Pro-victim                                            | Attitudes that discourage bullying |
| Nocentini, <sup>48</sup> 2016 | Empathy toward the victim                             | Attitudes that discourage bullying |
| Nocentini, <sup>49</sup> 2018 | Bullying                                              | Bullying perpetration              |
| Nocentini, <sup>49</sup> 2018 | Victimization                                         | Bullying exposure                  |
| Nocentini, <sup>49</sup> 2018 | Internalizing symptoms                                | Mental health problems             |
| Nocentini, <sup>49</sup> 2018 | Externalizing symptoms                                | Mental health problems             |

© 2020 American Medical Association. All rights reserved.

|                                    |                                                          |                                    |
|------------------------------------|----------------------------------------------------------|------------------------------------|
| Ostrov, <sup>50</sup> 2015         | Physical bullying                                        | Bullying perpetration              |
| Ostrov, <sup>50</sup> 2015         | Relational bullying                                      | Bullying perpetration              |
| Ostrov, <sup>50</sup> 2015         | Physical victimization                                   | Bullying exposure                  |
| Ostrov, <sup>50</sup> 2015         | Relational victimization                                 | Bullying exposure                  |
| Pfetsch, <sup>80</sup> 2018        | Individual anti-cyberbullying norm                       | Attitudes that discourage bullying |
| Pfetsch, <sup>80</sup> 2018        | Classroom anti-cyberbullying norm                        | Attitudes that discourage bullying |
| Sanchez, <sup>51</sup> 2001        | Bullying school or on the bus                            | Bullying perpetration              |
| Santos, <sup>52</sup> 2011         | Physical aggression. Students                            | Bullying perpetration              |
| Santos, <sup>52</sup> 2011         | Physical aggression. Teachers                            | Bullying perpetration              |
| Santos, <sup>52</sup> 2011         | Indirect aggression. Students                            | Bullying perpetration              |
| Santos, <sup>52</sup> 2011         | Indirect aggression. Teachers                            | Bullying perpetration              |
| Santos, <sup>52</sup> 2011         | Prosocial Behaviour. Students                            | Bullying perpetration              |
| Santos, <sup>52</sup> 2011         | Prosocial Behaviour. Teachers                            | Attitudes that discourage bullying |
| Schechtman, <sup>63</sup> 2009     | Aggressive. Internalizing                                | Attitudes that discourage bullying |
| Schechtman, <sup>63</sup> 2009     | Aggressive. Externalizing                                | Mental health problems             |
| Schechtman, <sup>63</sup> 2009     | Aggressive Class relations                               | Mental health problems             |
| Schechtman, <sup>63</sup> 2009     | Non-Aggressive Child aggression. Total                   | Attitudes that encourage bullying  |
| Schechtman, <sup>63</sup> 2009     | Non-Aggressive Class aggression. Total                   | Attitudes that encourage bullying  |
| Schechtman, <sup>63</sup> 2009     | Non-Aggressive Class relations                           | Attitudes that encourage bullying  |
| Shams, <sup>81</sup> 2018          | Bullying behavior                                        | Bullying perpetration              |
| Sorrentino, <sup>53</sup> 2018     | Tabby Improved checklist-Cyberbullying                   | Cyberbullying                      |
| Sorrentino, <sup>53</sup> 2018     | Tabby Improved checklist-Cybervictimization              | Cyberbullying                      |
| Stelko-Pereira, <sup>82</sup> 2015 | Students-victimization by students                       | Bullying exposure                  |
| Stelko-Pereira, <sup>82</sup> 2015 | Students-perpetration of violence to students            | Bullying perpetration              |
| Stelko-Pereira, <sup>82</sup> 2015 | Students-victimization by staff                          | Bullying exposure                  |
| Stelko-Pereira, <sup>82</sup> 2015 | Students-school engagement                               | School climate                     |
| Stelko-Pereira, <sup>82</sup> 2015 | Teachers-mental health problems                          | Mental health problems             |
| Stelko-Pereira, <sup>82</sup> 2015 | Teachers-perception of student victimization by students | Bullying exposure                  |
| Stevens, <sup>83</sup> 2000        | Self-efficacy factor                                     | Attitudes that discourage bullying |
| Stevens, <sup>83</sup> 2000        | Intention factor                                         | Attitudes that discourage bullying |
| Stevens, <sup>83</sup> 2000        | Behaviour factor                                         | Attitudes that discourage bullying |
| Stevens, <sup>83</sup> 2000        | Behaviour factor. Reacting against bullies               | Attitudes that discourage bullying |
| Stevens, <sup>83</sup> 2000        | Behaviour factor. Supporting victims of bullying         | Attitudes that discourage bullying |

© 2020 American Medical Association. All rights reserved.

|                                  |                                          |                                    |
|----------------------------------|------------------------------------------|------------------------------------|
| Stevens, <sup>83</sup> 2000      | Behaviour factor. Seeking teacher's help | Attitudes that discourage bullying |
| Swaim, <sup>84</sup> 2008        | Self-efficacy                            | Attitudes that discourage bullying |
| Swaim, <sup>84</sup> 2008        | Violent intentions                       | Attitudes that discourage bullying |
| Swaim, <sup>84</sup> 2008        | Verbal assault                           | Attitudes that encourage bullying  |
| Swaim, <sup>84</sup> 2008        | Physical assault against objects         | Attitudes that encourage bullying  |
| Swaim, <sup>84</sup> 2008        | Physical assault against people          | Attitudes that encourage bullying  |
| Swaim, <sup>84</sup> 2008        | Verbal victimization                     | Attitudes that encourage bullying  |
| Swaim, <sup>84</sup> 2008        | Physical victimization                   | Bullying exposure                  |
| Swaim, <sup>84</sup> 2008        | Perceived safety                         | Bullying exposure                  |
| Swaim, <sup>84</sup> 2008        | Self-efficacy                            | School climate                     |
| Swaim, <sup>84</sup> 2008        | Violent intentions                       | Attitudes that discourage bullying |
| Swaim, <sup>84</sup> 2008        | Verbal assault                           | Attitudes that encourage bullying  |
| Swaim, <sup>84</sup> 2008        | Physical assault against objects         | Attitudes that encourage bullying  |
| Swaim, <sup>84</sup> 2008        | Physical assault against people          | Attitudes that encourage bullying  |
| Swaim, <sup>84</sup> 2008        | Verbal victimization                     | Attitudes that encourage bullying  |
| Swaim, <sup>84</sup> 2008        | Physical victimization                   | Bullying exposure                  |
| Swaim, <sup>84</sup> 2008        | Perceived safety                         | Bullying exposure                  |
| Tanrikulu, <sup>54</sup> 2015    | Cyberbullying                            | Cyberbullying                      |
| Trip, <sup>55</sup> 2015         | Bullying victimization ViSC-REBE         | Bullying exposure                  |
| Trip, <sup>55</sup> 2015         | Bullying perpetration ViSC-REBE          | Bullying exposure                  |
| Trip, <sup>55</sup> 2015         | Bullying victimization ViSC-REBE         | Bullying perpetration              |
| Trip, <sup>55</sup> 2015         | Bullying perpetration ViSC-REBE          | Bullying exposure                  |
| Tsiantis, <sup>56</sup> 2013     | Students victims                         | Bullying exposure                  |
| Tsiantis, <sup>56</sup> 2013     | Students bullies                         | Bullying perpetration              |
| Tsiantis, <sup>56</sup> 2013     | Students bullies and victims             | Bullying perpetration              |
| Tsiantis, <sup>56</sup> 2013     | Bullying                                 | Bullying perpetration              |
| Tsiantis, <sup>56</sup> 2013     | Victimization for bullying               | Bullying exposure                  |
| van den Berg, <sup>57</sup> 2012 | Best friend                              | Bullying exposure                  |
| van den Berg, <sup>57</sup> 2012 | Acceptance                               | Attitudes that discourage bullying |
| van den Berg, <sup>57</sup> 2012 | Rejection                                | Attitudes that discourage bullying |
| van den Berg, <sup>57</sup> 2012 | Popularity                               | Attitudes that encourage bullying  |
| van den Berg, <sup>57</sup> 2012 | Unpopularity                             | School climate                     |
| van den Berg, <sup>57</sup> 2012 | Desired peer affiliation                 | School climate                     |

© 2020 American Medical Association. All rights reserved.

|                                                                                                                                                                                                                                                                                                                                                                                                                                                                                                                                                                                                                                                                                                                            |                                                                                           |                        |
|----------------------------------------------------------------------------------------------------------------------------------------------------------------------------------------------------------------------------------------------------------------------------------------------------------------------------------------------------------------------------------------------------------------------------------------------------------------------------------------------------------------------------------------------------------------------------------------------------------------------------------------------------------------------------------------------------------------------------|-------------------------------------------------------------------------------------------|------------------------|
| van den Berg, <sup>57</sup> 2012                                                                                                                                                                                                                                                                                                                                                                                                                                                                                                                                                                                                                                                                                           | Relational aggression                                                                     | School climate         |
| van den Berg, <sup>57</sup> 2012                                                                                                                                                                                                                                                                                                                                                                                                                                                                                                                                                                                                                                                                                           | Physical aggression                                                                       | Bullying perpetration  |
| van den Berg, <sup>57</sup> 2012                                                                                                                                                                                                                                                                                                                                                                                                                                                                                                                                                                                                                                                                                           | Victimization                                                                             | Bullying perpetration  |
| van den Berg, <sup>57</sup> 2012                                                                                                                                                                                                                                                                                                                                                                                                                                                                                                                                                                                                                                                                                           | Withdrawn behavior                                                                        | Bullying exposure      |
| van den Berg, <sup>57</sup> 2012                                                                                                                                                                                                                                                                                                                                                                                                                                                                                                                                                                                                                                                                                           | Prosocial behavior                                                                        | Bullying exposure      |
| Wójcik, <sup>85</sup> 2018                                                                                                                                                                                                                                                                                                                                                                                                                                                                                                                                                                                                                                                                                                 | Total bullying index of individual bullying behavior                                      | Bullying perpetration  |
| Yan, <sup>58</sup> 2019                                                                                                                                                                                                                                                                                                                                                                                                                                                                                                                                                                                                                                                                                                    | School life satisfaction                                                                  | School climate         |
| Yan, <sup>58</sup> 2019                                                                                                                                                                                                                                                                                                                                                                                                                                                                                                                                                                                                                                                                                                    | Fear of negative evaluation                                                               | Mental health problems |
| Yan, <sup>58</sup> 2019                                                                                                                                                                                                                                                                                                                                                                                                                                                                                                                                                                                                                                                                                                    | Social avoidance and distress                                                             | Mental health problems |
| Yan, <sup>58</sup> 2019                                                                                                                                                                                                                                                                                                                                                                                                                                                                                                                                                                                                                                                                                                    | Social anxiety                                                                            | Mental health problems |
| Yan, <sup>58</sup> 2019                                                                                                                                                                                                                                                                                                                                                                                                                                                                                                                                                                                                                                                                                                    | Self-stem                                                                                 | Mental health problems |
| Yan, <sup>58</sup> 2019                                                                                                                                                                                                                                                                                                                                                                                                                                                                                                                                                                                                                                                                                                    | Bullying victimization                                                                    | Bullying exposure      |
| Yeager, <sup>64</sup> 2012                                                                                                                                                                                                                                                                                                                                                                                                                                                                                                                                                                                                                                                                                                 | Intervention vs Coping Skills Aggression behavior                                         | Bullying perpetration  |
| Yeager, <sup>64</sup> 2012                                                                                                                                                                                                                                                                                                                                                                                                                                                                                                                                                                                                                                                                                                 | Intervention vs No treatment Aggression behavior                                          | Bullying perpetration  |
| Yeager, <sup>64</sup> 2012                                                                                                                                                                                                                                                                                                                                                                                                                                                                                                                                                                                                                                                                                                 | Intervention vs Coping Skills Depressive symptoms victims                                 | Mental health problems |
| Yeager, <sup>64</sup> 2012                                                                                                                                                                                                                                                                                                                                                                                                                                                                                                                                                                                                                                                                                                 | Intervention vs No treatment Depressive symptoms victims                                  | Mental health problems |
| Yeager, <sup>64</sup> 2012                                                                                                                                                                                                                                                                                                                                                                                                                                                                                                                                                                                                                                                                                                 | Intervention vs Coping Skills Depressive symptoms non victims                             | Mental health problems |
| Yeager, <sup>64</sup> 2012                                                                                                                                                                                                                                                                                                                                                                                                                                                                                                                                                                                                                                                                                                 | Intervention vs No treatment Depressive symptoms non victims                              | Mental health problems |
| Yeager, <sup>64</sup> 2012                                                                                                                                                                                                                                                                                                                                                                                                                                                                                                                                                                                                                                                                                                 | Intervention vs Coping Skills Teacher nominations reductions conduct problems victims     | Bullying perpetration  |
| Yeager, <sup>64</sup> 2012                                                                                                                                                                                                                                                                                                                                                                                                                                                                                                                                                                                                                                                                                                 | Intervention vs No treatment Teacher nominations reductions conduct problems victims      | Bullying perpetration  |
| Yeager, <sup>64</sup> 2012                                                                                                                                                                                                                                                                                                                                                                                                                                                                                                                                                                                                                                                                                                 | Intervention vs Coping Skills Teacher nominations reductions conduct problems non victims | Bullying perpetration  |
| Yeager, <sup>64</sup> 2012                                                                                                                                                                                                                                                                                                                                                                                                                                                                                                                                                                                                                                                                                                 | Intervention vs No treatment Teacher nominations reductions conduct problems non victims  | Bullying perpetration  |
| <b>Abbreviations:</b> CPPRG, Conduct Problems Prevention Research Group; CYRM: Child and Youth Resilience Measure; PedsQL: Paediatric Quality of Life Inventory; RBIQ: Bullying Incidents Questionnaire; SDQ: Strengths and Difficulties Questionnaire; SEQ-C: Self-Efficacy Questionnaire for Children; SIKS: Social Integration, Classroom Climate and Self-concept of School Readiness; SROM: Stuttering Resource Outcome Measure; SROM-PSD: Stuttering Resource Outcome Measure-Positive Social Distance; SROM-SP: Stuttering Resource Outcome Measure-Social Pressure; SROM-VI: Stuttering Resource Outcome Measure-Verbal Interaction; ViSC-REBE: Viennese Social Competence- Rational Emotive Behavioral Education. |                                                                                           |                        |

**Table 3. Quality assessment**

| STUDY (first author, year)        | 1.- Selection bias:<br>Random sequence<br>generation | 2.- Performance<br>bias | 3.-<br>Detection<br>bias | 4.- Attrition<br>bias | 5.- Reporting<br>bias | 6.- Other<br>bias | TOTAL |
|-----------------------------------|------------------------------------------------------|-------------------------|--------------------------|-----------------------|-----------------------|-------------------|-------|
| Athanasiaides, <sup>17</sup> 2015 | 1                                                    | 0                       | 1                        | 0                     | 1                     | 1                 | 4     |
| Baldry, <sup>18</sup> 2004        | 1                                                    | 1                       | 1                        | 2                     | 2                     | 1                 | 8     |
| Barkoukis, <sup>65</sup> 2016     | 1                                                    | 0                       | 1                        | 1                     | 2                     | 2                 | 7     |
| Bonell, <sup>19</sup> 2018        | 2                                                    | 1                       | 2                        | 2                     | 2                     | 1                 | 10    |
| Bonell, <sup>66</sup> 2019        | 2                                                    | 1                       | 1                        | 1                     | 2                     | 1                 | 8     |
| Boulton, <sup>20</sup> 1996       | 1                                                    | 0                       | 0                        | 1                     | 2                     | 2                 | 6     |
| Boulton, <sup>59</sup> 2017       | 1                                                    | 0                       | 1                        | 2                     | 2                     | 2                 | 8     |
| Bowes, <sup>21</sup> 2019         | 1                                                    | 0                       | 0                        | 0                     | 2                     | 2                 | 5     |
| Brown, <sup>22</sup> 2011         | 2                                                    | 0                       | 2                        | 2                     | 2                     | 2                 | 10    |
| Calvete, <sup>67</sup> 2019       | 2                                                    | 2                       | 1                        | 2                     | 2                     | 2                 | 11    |
| Cappella, <sup>68</sup> 2012      | 2                                                    | 0                       | 2                        | 2                     | 2                     | 1                 | 9     |
| Chen, <sup>69</sup> 2017          | 2                                                    | 1                       | 1                        | 2                     | 2                     | 2                 | 10    |
| Connolly, <sup>23</sup> 2015      | 2                                                    | 2                       | 0                        | 2                     | 2                     | 1                 | 9     |
| CPPRG, <sup>24</sup> 2010         | 1                                                    | 0                       | 0                        | 2                     | 2                     | 1                 | 6     |
| Crean, <sup>25</sup> 2013         | 2                                                    | 0                       | 1                        | 2                     | 2                     | 1                 | 8     |
| Cross, <sup>70</sup> 2011         | 2                                                    | 1                       | 1                        | 2                     | 1                     | 1                 | 8     |
| Cross, <sup>26</sup> 2016         | 1                                                    | 0                       | 1                        | 2                     | 1                     | 2                 | 7     |
| DeRosier, <sup>27</sup> 2004      | 2                                                    | 0                       | 1                        | 1                     | 2                     | 1                 | 7     |
| DeRosier, <sup>71</sup> 2005      | 2                                                    | 0                       | 1                        | 0                     | 2                     | 1                 | 6     |
| DeSmet, <sup>72</sup> 2018        | 2                                                    | 2                       | 0                        | 2                     | 2                     | 2                 | 10    |
| Espelage, <sup>28</sup> 2013      | 2                                                    | 0                       | 2                        | 2                     | 2                     | 1                 | 9     |
| Espelage, <sup>29</sup> 2015      | 2                                                    | 0                       | 0                        | 1                     | 2                     | 1                 | 6     |
| Espelage, <sup>60</sup> 2016      | 2                                                    | 0                       | 0                        | 1                     | 2                     | 1                 | 6     |
| Farmer, <sup>30</sup> 2017        | 2                                                    | 0                       | 0                        | 2                     | 1                     | 1                 | 6     |
| Fekkes, <sup>31</sup> 2006        | 1                                                    | 0                       | 1                        | 1                     | 1                     | 2                 | 6     |
| Fonagy, <sup>32</sup> 2009        | 2                                                    | 0                       | 0                        | 2                     | 2                     | 1                 | 7     |
| Frey, <sup>33</sup> 2005          | 1                                                    | 0                       | 1                        | 1                     | 2                     | 1                 | 6     |
| Giannotta, <sup>34</sup> 2009     | 1                                                    | 0                       | 1                        | 2                     | 2                     | 2                 | 8     |

© 2020 American Medical Association. All rights reserved.

|                                             |   |   |   |   |   |   |    |
|---------------------------------------------|---|---|---|---|---|---|----|
| <b>Gradinger,<sup>35</sup> 2015</b>         | 1 | 0 | 1 | 2 | 2 | 1 | 7  |
| <b>Green,<sup>36</sup> 2020</b>             | 2 | 1 | 0 | 2 | 2 | 1 | 8  |
| <b>Gusmões,<sup>37</sup> 2018</b>           | 1 | 0 | 1 | 2 | 1 | 1 | 6  |
| <b>Holen,<sup>38</sup> 2013</b>             | 2 | 1 | 0 | 2 | 2 | 2 | 9  |
| <b>Hormazábal-Aguayo,<sup>39</sup> 2019</b> | 2 | 0 | 0 | 2 | 2 | 1 | 7  |
| <b>Hunt,<sup>40</sup> 2007</b>              | 1 | 0 | 1 | 1 | 2 | 1 | 6  |
| <b>Jenson,<sup>73</sup> 2013</b>            | 2 | 1 | 1 | 2 | 1 | 2 | 9  |
| <b>Ju,<sup>41</sup> 2009</b>                | 2 | 0 | 1 | 2 | 2 | 1 | 8  |
| <b>Kaljee,<sup>42</sup> 2017</b>            | 1 | 1 | 1 | 1 | 2 | 2 | 8  |
| <b>Karasimopoulou,<sup>74</sup> 2012</b>    | 1 | 0 | 1 | 0 | 2 | 1 | 5  |
| <b>Kärnä,<sup>43</sup> 2011</b>             | 1 | 0 | 1 | 1 | 2 | 1 | 6  |
| <b>Kärnä,<sup>44</sup> 2013</b>             | 2 | 0 | 1 | 2 | 1 | 1 | 7  |
| <b>Kathard,<sup>75</sup> 2014</b>           | 1 | 0 | 2 | 1 | 2 | 1 | 7  |
| <b>Knowler,<sup>45</sup> 2013</b>           | 1 | 0 | 1 | 1 | 2 | 0 | 5  |
| <b>Mallick,<sup>61</sup> 2018</b>           | 2 | 2 | 2 | 0 | 1 | 1 | 8  |
| <b>Meraviglia,<sup>46</sup> 2003</b>        | 1 | 0 | 0 | 1 | 2 | 1 | 5  |
| <b>Meyer,<sup>76</sup> 2000</b>             | 1 | 2 | 1 | 2 | 2 | 1 | 9  |
| <b>Midthassel,<sup>47</sup> 2008</b>        | 2 | 0 | 1 | 0 | 2 | 0 | 5  |
| <b>Moore,<sup>62</sup> 2018</b>             | 2 | 1 | 1 | 2 | 0 | 2 | 8  |
| <b>Muñoz-Fernández,<sup>77</sup> 2019</b>   | 2 | 1 | 1 | 2 | 2 | 2 | 10 |
| <b>Naidoo,<sup>78</sup> 2016</b>            | 1 | 0 | 1 | 1 | 2 | 1 | 6  |
| <b>Nieh,<sup>79</sup> 2018</b>              | 2 | 2 | 1 | 2 | 1 | 1 | 9  |
| <b>Nocentini,<sup>48</sup> 2016</b>         | 1 | 0 | 2 | 2 | 0 | 1 | 6  |
| <b>Nocentini,<sup>49</sup> 2018</b>         | 2 | 0 | 1 | 1 | 2 | 1 | 7  |
| <b>Ostrov,<sup>50</sup> 2015</b>            | 2 | 2 | 1 | 2 | 2 | 0 | 9  |
| <b>Pfetsch,<sup>80</sup> 2018</b>           | 2 | 0 | 0 | 1 | 1 | 1 | 5  |
| <b>Sanchez,<sup>51</sup> 2001</b>           | 1 | 0 | 0 | 2 | 1 | 1 | 5  |
| <b>Santos,<sup>52</sup> 2011</b>            | 2 | 0 | 0 | 1 | 1 | 1 | 5  |
| <b>Schechtman,<sup>63</sup> 2009</b>        | 1 | 0 | 0 | 1 | 1 | 1 | 4  |
| <b>Shams,<sup>81</sup> 2018</b>             | 2 | 1 | 1 | 2 | 2 | 1 | 9  |
| <b>Sorrentino,<sup>53</sup> 2018</b>        | 2 | 0 | 1 | 2 | 2 | 1 | 8  |
| <b>Stelko-Pereira,<sup>82</sup> 2015</b>    | 2 | 1 | 1 | 2 | 1 | 2 | 9  |
| <b>Stevens,<sup>83</sup> 2000</b>           | 1 | 0 | 1 | 1 | 2 | 0 | 5  |

© 2020 American Medical Association. All rights reserved.

|                                                                                                                                                                                                                                                   |   |   |   |   |   |   |           |
|---------------------------------------------------------------------------------------------------------------------------------------------------------------------------------------------------------------------------------------------------|---|---|---|---|---|---|-----------|
| <b>Swaim,<sup>84</sup> 2008</b>                                                                                                                                                                                                                   | 1 | 0 | 2 | 0 | 2 | 2 | <b>7</b>  |
| <b>Tanrikulu,<sup>54</sup> 2015</b>                                                                                                                                                                                                               | 2 | 1 | 1 | 2 | 0 | 0 | <b>6</b>  |
| <b>Trip,<sup>55</sup> 2015</b>                                                                                                                                                                                                                    | 1 | 0 | 1 | 2 | 1 | 2 | <b>7</b>  |
| <b>Tsiantis,<sup>56</sup> 2013</b>                                                                                                                                                                                                                | 2 | 1 | 1 | 2 | 0 | 0 | <b>6</b>  |
| <b>van den Berg,<sup>57</sup> 2012</b>                                                                                                                                                                                                            | 1 | 0 | 1 | 1 | 1 | 1 | <b>5</b>  |
| <b>Wójcik,<sup>85</sup> 2018</b>                                                                                                                                                                                                                  | 1 | 0 | 1 | 1 | 2 | 1 | <b>6</b>  |
| <b>Yan,<sup>58</sup> 2019</b>                                                                                                                                                                                                                     | 2 | 2 | 1 | 2 | 2 | 1 | <b>10</b> |
| <b>Yeager,<sup>64</sup> 2012</b>                                                                                                                                                                                                                  | 2 | 2 | 2 | 2 | 2 | 1 | <b>11</b> |
| Categories were scored on a 0 to 2 scale (low risk of bias (2 points), unclear (1 point) or high risk of bias (0 points)), where higher values representing greater quality.<br>Abbreviations: CPPRG, Conduct Problems Prevention Research Group. |   |   |   |   |   |   |           |



| <b>eTable 4. Characteristics of the included studies (part 1)</b> |                                                                                |               |                |                                           |                                    |                                     |                                       |                              |
|-------------------------------------------------------------------|--------------------------------------------------------------------------------|---------------|----------------|-------------------------------------------|------------------------------------|-------------------------------------|---------------------------------------|------------------------------|
| <b>Study (first author, year of publication)</b>                  | <b>Name of program (intervention on traditional bullying or cyberbullying)</b> | <b>Region</b> | <b>Country</b> | <b>City or state</b>                      | <b>Date of intervention</b>        | <b>Duration of intervention (w)</b> | <b>Mean duration of follow-up (w)</b> | <b>Type of randomization</b> |
| <b>Athanasiadis,<sup>17</sup> 2015</b>                            | Tabby Project                                                                  | Europe        | Greece         | Greater Metropolitan Area of Thessaloniki | Apr to Oct 2012                    | 24                                  | No F/U                                | Individual                   |
| <b>Baldry,<sup>18</sup> 2004</b>                                  | Bulli and Pupe (traditional bullying)                                          | Europe        | Italy          | Rome                                      | N/A                                | 3                                   | No F/U                                | Cluster                      |
| <b>Barkoukis,<sup>65</sup> 2016</b>                               | N/A (traditional bullying)                                                     | Europe        | Greece         | N/A                                       | N/A                                | 8                                   | No F/U                                | Cluster                      |
| <b>Bonell,<sup>19</sup> 2018</b>                                  | Learning Together                                                              | Europe        | UK             | Southeast England                         | 2014 to 2017                       | 144                                 | No F/U                                | Cluster                      |
| <b>Bonell,<sup>66</sup> 2019</b>                                  | Learning Together                                                              | Europe        | UK             | Southeast England                         | 2014 to 2017                       | 144                                 | No F/U                                | Cluster                      |
| <b>Boulton,<sup>20</sup> 1996</b>                                 | Sticks and Stones Video                                                        | N/A           | N/A            | N/A                                       | N/A                                | 1 day                               | No F/U                                | Cluster                      |
| <b>Boulton,<sup>59</sup> 2017</b>                                 | CATS (traditional bullying)                                                    | Europe        | UK             | Chester                                   | N/A                                | 5                                   | 2                                     | Individual                   |
| <b>Bowes,<sup>21</sup> 2019</b>                                   | ROOTS Indonesia program                                                        | Asia          | Indonesia      | Central Java (Klaten and Semarang)        | N/A                                | 12                                  | No F/U                                | Cluster                      |
| <b>Brown,<sup>22</sup> 2011</b>                                   | Steps to Respect (traditional bullying)                                        | North America | USA            | California                                | N/A                                | 36                                  | No F/U                                | Cluster                      |
| <b>Calvete,<sup>67</sup> 2019</b>                                 | Incremental theory of personality interventions (ITPI)                         | Europe        | Spain          | Bizkaia (Basque Country)                  | N/A                                | 1 day                               | 24                                    | Individual                   |
| <b>Cappella,<sup>68</sup> 2012</b>                                | Teacher consultation and coaching (traditional bullying)                       | North America | USA            | New York                                  | Jan to Apr (year N/A)              | 16                                  | 8                                     | Cluster                      |
| <b>Chen,<sup>69</sup> 2017</b>                                    | N/A                                                                            | Asia          | China          | Northern, central and southern Taiwan     | N/A                                | 1 day                               | No F/U                                | Individual                   |
| <b>Connolly,<sup>23</sup> 2015</b>                                | Respect in Schools Everywhere (RISE)                                           | North America | Canada         | Urban Canadian                            | Fall to winter (year N/A)          | 16                                  | No F/U                                | Cluster                      |
| <b>CPPRG,<sup>24</sup> 2010</b>                                   | PATHS, Fast Track                                                              | North America | USA            | Nashville, Pennsylvania, Seattle          | Sept to May (year N/A)             | 36                                  | No F/U                                | Cluster                      |
| <b>Crean,<sup>25</sup> 2013</b>                                   | PATHS (traditional bullying)                                                   | North America | USA            | New York                                  | Sept to Jun for 3 years (year N/A) | 108                                 | No F/U                                | Cluster                      |

© 2020 American Medical Association. All rights reserved.

|                                     |                                                                                  |               |             |                                        |                          |     |        |            |
|-------------------------------------|----------------------------------------------------------------------------------|---------------|-------------|----------------------------------------|--------------------------|-----|--------|------------|
| <b>Cross,<sup>70</sup> 2011</b>     | Friendly Schools Intervention                                                    | Other         | Australia   | Perth                                  | Apr 2000 to Nov 2002     | 104 | 52-104 | Cluster    |
| <b>Cross,<sup>26</sup> 2016</b>     | Cyber Friendly Schools (cyberbullying)                                           | Other         | Australia   | Perth                                  | 2010 to 2011             | 78  | 52     | Cluster    |
| <b>DeRosier,<sup>27</sup> 2004</b>  | S.S.GRIN (Social Skills Group Intervention) (traditional bullying)               | North America | USA         | North Carolina                         | Jan to Apr (year N/A)    | 16  | No F/U | Individual |
| <b>DeRosier,<sup>71</sup> 2005</b>  | S.S.GRIN (Social Skills Group Intervention) (traditional bullying)               | North America | USA         | North Carolina                         | Jan to Apr (year N/A)    | 17  | 52     | Individual |
| <b>DeSmet,<sup>72</sup> 2018</b>    | Friendly Attac                                                                   | Europe        | Belgium     | Flanders                               | N/A                      | N/A | 4      | Cluster    |
| <b>Espelage,<sup>28</sup> 2013</b>  | Second Step: Student Success Through Prevention (SS-SSTP) (traditional bullying) | North America | USA         | Illinois and Kansas                    | Sept 2010 to May 2013    | 36  | No F/U | Individual |
| <b>Espelage,<sup>29</sup> 2015</b>  | Second Step: Student Success Through Prevention (SS-SSTP)                        | North America | USA         | Midwestern United States               | Fall 2010 to Spring 2013 | 36  | No F/U | Individual |
| <b>Espelage,<sup>60</sup> 2016</b>  | Second Step: Student Success Through Prevention (SS-SSTP)                        | North America | USA         | Midwestern United States               | Fall 2010 to Spring 2013 | 36  | No F/U | Individual |
| <b>Farmer,<sup>30</sup> 2017</b>    | School Playground Environment (traditional bullying)                             | Other         | New Zealand | Otago and Auckland                     | 2011 to 2013             | 52  | 52     | Cluster    |
| <b>Fekkes,<sup>31</sup> 2006</b>    | N/A (traditional bullying)                                                       | Europe        | Netherlands | N/A                                    | Nov 1999 to May 2000     | 24  | 52     | Cluster    |
| <b>Fonagy,<sup>32</sup> 2009</b>    | CAPSLE (traditional bullying)                                                    | Europe        | UK          | Medium-sized Midwestern city in the UK | N/A                      | 72  | 52     | Cluster    |
| <b>Frey,<sup>33</sup> 2005</b>      | Steps to Respect (traditional bullying)                                          | North America | USA         | Pacific Northwest                      | Nov 2000 to May 2001     | 14  | No F/U | Cluster    |
| <b>Giannotta,<sup>34</sup> 2009</b> | Expressive Writing (traditional bullying)                                        | Europe        | Italy       | Urban area in Northern Italy           | N/A                      | 2   | No F/U | Individual |
| <b>Gradinger,<sup>35</sup> 2015</b> | ViSC Social Competence Program                                                   | Europe        | Austria     | Vienna                                 | Sept 2009 to Jun 2010    | 36  | No F/U | Cluster    |
| <b>Green,<sup>36</sup> 2020</b>     | Boston vs Bullies                                                                | North America | USA         | Boston, Massachusetts                  | 2017 to 2018             | 4   | No F/U | Cluster    |

© 2020 American Medical Association. All rights reserved.

|                                             |                                                              |               |              |                                                                                       |                           |       |        |            |
|---------------------------------------------|--------------------------------------------------------------|---------------|--------------|---------------------------------------------------------------------------------------|---------------------------|-------|--------|------------|
| <b>Gusmões,<sup>37</sup> 2018</b>           | #Tamojunto Prevention Program (traditional bullying)         | Other         | Brazil       | Sau Paulo, Federal District, Sau Bernardo do Cambo, Florianopolis, Tubarao, Fortaleza | Feb 2014 to Nov 2014      | 36    | 52     | Cluster    |
| <b>Holen,<sup>38</sup> 2013</b>             | Zippys Friends                                               | Europe        | Norway       | Trondheim, Bodo, Osfold                                                               | 2007 to 2008              | 24    | No F/U | Cluster    |
| <b>Hormazábal-Aguayo,<sup>39</sup> 2019</b> | Active-Start Intervention                                    | South America | Chile        | Santiago                                                                              | Aug 2018 to Dec 2018      | 8     | No F/U | Cluster    |
| <b>Hunt,<sup>40</sup> 2007</b>              | Antibullying program in Sydney (traditional bullying)        | Other         | Australia    | Sydney                                                                                | 2001 to 2002              | 52    | No F/U | Cluster    |
| <b>Jenson,<sup>73</sup> 2013</b>            | Youth Matters                                                | North America | USA          | Denver, Colorado                                                                      | Fall to Spring (year N/A) | 104   | 104    | Cluster    |
| <b>Ju,<sup>41</sup> 2009</b>                | N/A                                                          | Asia          | China        | Jinan City, Shandong                                                                  | Winter 2000               | 5     | No F/U | Cluster    |
| <b>Kaljee,<sup>42</sup> 2017</b>            | Teachers Diploma Program (traditional bullying)              | Other         | Zambia       | N/A                                                                                   | 2013 to 2014              | 60    | No F/U | Cluster    |
| <b>Karasimopoulou,<sup>74</sup> 2012</b>    | Skills for elementary school children (traditional bullying) | Europe        | Greece       | N/A                                                                                   | N/A                       | 23    | No F/U | Cluster    |
| <b>Kärnä,<sup>43</sup> 2011</b>             | KiVa (traditional bullying)                                  | Europe        | Finland      | Finland                                                                               | 2007 to 2008              | 39    | No F/U | Cluster    |
| <b>Kärnä,<sup>44</sup> 2013</b>             | KiVa (traditional bullying)                                  | Europe        | Finland      | Finland                                                                               | May 2008 to May 2009      | 36    | No F/U | Cluster    |
| <b>Kathard,<sup>75</sup> 2014</b>           | Classroom Communication Resource (traditional bullying)      | Other         | South Africa | Cape Town                                                                             | N/A                       | 1     | 24     | Cluster    |
| <b>Knowler,<sup>45</sup> 2013</b>           | Emotional literacy (EL) intervention (traditional bullying)  | Europe        | UK           | London                                                                                | N/A                       | 12    | No F/U | Individual |
| <b>Mallick,<sup>61</sup> 2018</b>           | Classroom Communication Resource                             | Other         | South Africa | Cape Town                                                                             | Feb 2017 to Aug 2017      | 1 day | No F/U | Cluster    |
| <b>Meraviglia,<sup>46</sup> 2003</b>        | Expect Respect Project (traditional bullying)                | North America | USA          | Texas                                                                                 | Fall 1998 to Spring 1999  | 36    | No F/U | Cluster    |
| <b>Meyer,<sup>76</sup> 2000</b>             | N/A                                                          | Other         | South Africa | Stellenbosch Suburb (Western Cape)                                                    | N/A                       | 12    | N/A    | Individual |
| <b>Midthassel,<sup>47</sup> 2008</b>        | ZERO Program                                                 | Europe        | Norway       | Norway                                                                                | 2004 to 2006              | 104   | No F/U | Cluster    |

© 2020 American Medical Association. All rights reserved.

|                                           |                                                                          |               |              |                                        |                          |            |        |            |
|-------------------------------------------|--------------------------------------------------------------------------|---------------|--------------|----------------------------------------|--------------------------|------------|--------|------------|
| <b>Moore,<sup>62</sup> 2018</b>           | Art Martials                                                             | Other         | Australia    | New South Wales                        | N/A                      | 10         | No F/U | Cluster    |
| <b>Muñoz-Fernández,<sup>77</sup> 2019</b> | Dat-e Adolescence                                                        | Europe        | Spain        | Seville and Cordoba (Andalusia region) | Jan to Jun 2016          | 16         | 24     | Cluster    |
| <b>Naidoo,<sup>78</sup> 2016</b>          | Integrated Model for Behavior Change (traditional bullying)              | Other         | South Africa | KwaZulu-Natal                          | Feb to Oct 2013          | 36         | 20     | Cluster    |
| <b>Nieh,<sup>79</sup> 2018</b>            | Galaxy Rescuers game                                                     | Asia          | China        | Metro area in Northern Taiwan          | Fall 2015                | 7          | 2      | Cluster    |
| <b>Nocentini,<sup>48</sup> 2016</b>       | KiVa (traditional bullying)                                              | Europe        | Italy        | Florence, Siena, Lucca                 | 2013 to 2014             | 32         | No F/U | Cluster    |
| <b>Nocentini,<sup>49</sup> 2018</b>       | KiVa (traditional bullying)                                              | Europe        | Italy        | Tuscany                                | Sep 2013 to Jun 2014     | 36         | No F/U | Cluster    |
| <b>Ostrov,<sup>50</sup> 2015</b>          | Early Childhood Friendship Project                                       | North America | USA          | Western New York                       | N/A                      | 8          | No F/U | Cluster    |
| <b>Pfetsch,<sup>80</sup> 2018</b>         | N/A                                                                      | Europe        | Germany      | Germany                                | N/A                      | 1 day      | No F/U | Individual |
| <b>Sanchez,<sup>51</sup> 2001</b>         | Bullyproof                                                               | North America | USA          | Austin, Texas                          | Fall 1998 to Spring 1999 | 12         | No F/U | Cluster    |
| <b>Santos,<sup>52</sup> 2011</b>          | Roots of Empathy (traditional bullying)                                  | North America | Canada       | Manitoba                               | 2002 to 2003             | 36         | 104    | Cluster    |
| <b>Schechtman,<sup>63</sup> 2009</b>      | Classroom and counselling intervention (traditional bullying)            | Middle East   | Israel       | N/A                                    | Dec to Mar (year N/A)    | 16         | No F/U | Cluster    |
| <b>Shams,<sup>81</sup> 2018</b>           | Educational Intervention                                                 | Middle East   | Iran         | Gonabad City                           | Sept 2015 to May 2016    | 3 sessions | 24     | Cluster    |
| <b>Sorrentino,<sup>53</sup> 2018</b>      | Tabby Improved Prevention and Intervention Program (TIPIP)               | Europe        | Italy        | Campania region, Southern Italy        | Dec 2015 to Jun 2016     | N/A        | No F/U | Cluster    |
| <b>Stelko-Pereira,<sup>82</sup> 2015</b>  | Violencia Nota Zero                                                      | South America | Brazil       | Mid-sized city in Sao Paulo State      | N/A                      | 12         | 36     | Cluster    |
| <b>Stevens,<sup>83</sup> 2000</b>         | The Flemish school-based Antbullying intervention (traditional bullying) | Europe        | Belgium      | N/A                                    | Oct 1995 to May 1996     | 32         | 52     | Cluster    |
| <b>Swaim,<sup>84</sup> 2008</b>           | Resolve It, Solve It (traditional bullying)                              | North America | USA          | Five states (KY, LA, IL, ID, CA)       | N/A                      | N/A        | 78     | Individual |

© 2020 American Medical Association. All rights reserved.

|                                                                    |                                                       |               |                 |                                              |                        |    |        |            |
|--------------------------------------------------------------------|-------------------------------------------------------|---------------|-----------------|----------------------------------------------|------------------------|----|--------|------------|
| <b>Tanrikulu,<sup>54</sup> 2015</b>                                | Sensibility Development Program against Cyberbullying | Middle East   | Turkey          | Istanbul                                     | May to Jun 2011        | 5  | No F/U | Individual |
| <b>Trip,<sup>55</sup> 2015</b>                                     | REBE-ViSC program (traditional bullying)              | Europe        | Romania         | Oradea                                       | Oct 2011 to Jun 2012   | 36 | No F/U | Cluster    |
| <b>Tsiantis,<sup>56</sup> 2013</b>                                 | N/A                                                   | Europe        | Greece          | Attica, metropolitan area in Southern Greece | Nov 2011 to May 2012   | 11 | No F/U | Cluster    |
| <b>van den Berg,<sup>57</sup> 2012</b>                             | Classroom Arrangements (traditional bullying)         | Europe        | The Netherlands | The Netherlands                              | N/A                    | 14 | No F/U | Cluster    |
| <b>Wójcik,<sup>85</sup> 2018</b>                                   | ABBL program (traditional bullying)                   | Europe        | Poland          | Silesian Region                              | Sept to Nov (year N/A) | 11 | 8      | Cluster    |
| <b>Yan,<sup>58</sup> 2019</b>                                      | Left-behind Children (LBC)                            | Asia          | China           | Hunan, Henan, Liaoning, and Guangxi          | Jun 2017 to Apr 2018   | 12 | No F/U | Individual |
| <b>Yeager,<sup>64</sup> 2012</b>                                   | Incremental theory of intelligence                    | North America | USA             | San Francisco Bay Area                       | N/A                    | 3  | No F/U | Cluster    |
| Abbreviations: N/A, not available; No F/U, No follow-up; w, weeks. |                                                       |               |                 |                                              |                        |    |        |            |

| eTable 5. Characteristics of the included studies (part 2) |                                   |                       |                              |                       |                                  |                             |                       |                        |                         |                    |                                              |                                 |
|------------------------------------------------------------|-----------------------------------|-----------------------|------------------------------|-----------------------|----------------------------------|-----------------------------|-----------------------|------------------------|-------------------------|--------------------|----------------------------------------------|---------------------------------|
| STUDY (first author, year of publication)                  | N individuals intervention groups | k intervention groups | N individuals control groups | k control groups      | Mean age (intervention group), y | Age range (intervention), y | Mean age (control), y | Age range (control), y | % Female (intervention) | % Female (control) | Type of intervention (Universal or Targeted) | Primary or Secondary educations |
| Athanasziades, <sup>17</sup> 2015                          | 123                               | N/A                   | 140                          | N/A                   | N/A                              | 13 to 14                    | N/A                   | 13 to 14               | 50%                     | 50%                | Universal                                    | Secondary                       |
| Baldry, <sup>18</sup> 2004                                 | 131                               | 4                     | 106                          | 4                     | 13.2                             | 11 to 15                    | 13.5                  | 11 to 15               | 48%                     | 54%                | Universal                                    | Both                            |
| Barkoukis, <sup>65</sup> 2016                              | 212                               | 2                     | 143                          | 2                     | 14.7                             | 13 to 17                    | 15.7                  | 13 to 17               | 54%                     | 55%                | Universal                                    | Secondary                       |
| Bonell, <sup>19</sup> 2018                                 | 3320                              | 20                    | 3347                         | 20                    | 11.8                             | 11 to 12                    | 11.8                  | 11 to 12               | 55%                     | 50%                | Universal                                    | Primary                         |
| Bonell, <sup>66</sup> 2019                                 | 2044                              | 20                    | 2073                         | 20                    | 11.8                             | 11 to 12                    | 11.8                  | 11 to 12               | 55%                     | 50%                | Universal                                    | Primary                         |
| Boulton, <sup>20</sup> 1996                                | N/A                               | 4                     | N/A                          | 4                     | N/A                              | 11 to 14                    | N/A                   | 11 to 14               | 51.8%                   | 51.8%              | Universal                                    | Secondary                       |
| Boulton, <sup>59</sup> 2017                                | 21                                | N/A                   | 20                           | N/A                   | 14.5                             | N/A                         | 14.5                  | N/A                    | 52%                     | 50%                | Universal                                    | Secondary                       |
| Bowes, <sup>21</sup> 2019                                  | 2654                              | 4                     | 2654                         | 4                     | 13.3                             | 12 to 15                    | 13.2                  | 12 to 15               | 47%                     | 50%                | Universal                                    | Secondary                       |
| Brown, <sup>22</sup> 2011                                  | 1485                              | 64                    | 1485                         | 64                    | 8.9                              | 7 to 11                     | 8.9                   | 7 to 11                | 51%                     | 48%                | Universal                                    | Primary                         |
| Calvete, <sup>67</sup> 2019                                | 450                               | N/A                   | 450                          | N/A                   | 14.6                             | 12 to 17                    | 14.6                  | 12 to 17               | 48%                     | 48%                | Universal                                    | Secondary                       |
| Cappella, <sup>68</sup> 2012                               | 169                               | 18                    | 178                          | 18                    | 8.0                              | N/A                         | 8.0                   | N/A                    | 43%                     | 43%                | Targeted                                     | Primary                         |
| Chen, <sup>69</sup> 2017                                   | 140                               | 1                     | 142                          | 1                     | 38.7                             | N/A                         | 38.7                  | N/A                    | 39%                     | 71%                | Universal                                    | Both                            |
| Connolly, <sup>23</sup> 2015                               | 209                               | 2 schools<br>15 class | 300                          | 2 schools<br>26 class | 12.37                            | 11 to 14                    | 12.37                 | 11 to 14               | 51%                     | 51%                | Universal                                    | Secondary                       |
| CPPRG, <sup>24</sup> 2010                                  | 2937                              | 190                   | 2937                         | 180                   | 7                                | 6 to 8                      | 7                     | 6 to 8                 | N/A                     | N/A                | Universal                                    | Primary                         |
| Crean, <sup>25</sup> 2013                                  | 422                               | 7                     | 357                          | 7                     | N/A                              | 8 to 12                     | N/A                   | 8 to 12                | 57%                     | 57%                | Universal                                    | Primary                         |
| Cross, <sup>70</sup> 2011                                  | 984                               | 15                    | 863                          | 14                    | 8.57                             | N/A                         | 8.55                  | N/A                    | 51%                     | 48%                | Universal                                    | Primary                         |
| Cross, <sup>26</sup> 2016                                  | 1563                              | 19                    | 1246                         | 16                    | 12.9                             | 12 to 14                    | 12.9                  | 12 to 14               | 53%                     | 53%                | Universal                                    | Secondary                       |

© 2020 American Medical Association. All rights reserved.

|                                             |      |                          |      |                          |       |          |       |          |     |     |           |           |
|---------------------------------------------|------|--------------------------|------|--------------------------|-------|----------|-------|----------|-----|-----|-----------|-----------|
| <b>DeRosier,<sup>27</sup> 2004</b>          | 187  | 11                       | 194  | 11                       | 8.6   | 8 to 9   | 8.6   | 8 to 9   | 49% | 49% | Targeted  | Primary   |
| <b>DeRosier,<sup>71</sup> 2005</b>          | 187  | 11                       | 194  | 11                       | N/A   | 8 to 9   | N/A   | 8 to 9   | 51% | 51% | Targeted  | Primary   |
| <b>DeSmet,<sup>72</sup> 2018</b>            | 120  | 1                        | 96   | 1                        | 13.52 | 13 to 14 | 13.47 | 13 to 14 | 59% | 65% | Universal | Secondary |
| <b>Espelage,<sup>28</sup> 2013</b>          | 1942 | 20                       | 1678 | 20                       | 13.3  | 11 to 12 | 13.3  | 11 to 12 | 49% | 49% | Universal | Primary   |
| <b>Espelage,<sup>29</sup> 2015</b>          | 47   | N/A                      | 76   | N/A                      | 12.5  | 12 to 13 | 12.5  | 12 to 13 | 38% | 46% | Targeted  | Secondary |
| <b>Espelage,<sup>60</sup> 2016</b>          | 47   | N/A                      | 76   | N/A                      | 12.5  | 12 to 13 | 12.5  | 12 to 13 | 38% | 46% | Targeted  | Secondary |
| <b>Farmer,<sup>30</sup> 2017</b>            | 391  | 8                        | 369  | 8                        | 8.0   | 6 to 9   | 7.9   | 6 to 9   | 47% | 53% | Universal | Primary   |
| <b>Fekkes,<sup>31</sup> 2006</b>            | 1196 | 14                       | 1213 | 15                       | 10.1  | 9 to 12  | 10.1  | 9 to 12  | 50% | 50% | Universal | Primary   |
| <b>Fonagy,<sup>32</sup> 2009</b>            | 356  | 3                        | 221  | 3                        | 8.0   | N/A      | 8.0   | N/A      | N/A | N/A | Universal | Primary   |
| <b>Frey,<sup>33</sup> 2005</b>              | 549  | 6                        | 577  | 6                        | 10.0  | 8 to 12  | N/A   | N/A      | 51% | 48% | Universal | Primary   |
| <b>Giannotta,<sup>34</sup> 2009</b>         | 76   | 4                        | 79   | 4                        | 12.2  | N/A      | N/A   | N/A      | 52% | N/A | Universal | Secondary |
| <b>Gradinger,<sup>35</sup> 2015</b>         | 1192 | 13                       | 447  | 5                        | 11.7  | 10 to 15 | 11.6  | 10 to 15 | 49% | 45% | Universal | Secondary |
| <b>Green,<sup>36</sup> 2020</b>             | 388  | 6 schools<br>19 classes  | 266  | 4 schools<br>15 classes  | N/A   | 10 to 11 | N/A   | 10 to 11 | 52% | 51% | Universal | Primary   |
| <b>Gusmões,<sup>37</sup> 2018</b>           | 2460 | 38                       | 2547 | 34                       | 13.0  | 11 to 15 | 13.0  | 11 to 15 | 50% | 51% | Universal | Primary   |
| <b>Holen,<sup>38</sup> 2013</b>             | 640  | 18 schools<br>47 classes | 631  | 17 schools<br>44 classes | 7.3   | N/A      | 7.3   | N/A      | 49% | 49% | Universal | Primary   |
| <b>Hormazábal-Aguayo,<sup>39</sup> 2019</b> | 88   | 3                        | 58   | 2                        | 9.97  | 8 to 10  | 12.12 | 8 to 10  | 41% | 51% | Universal | Primary   |
| <b>Hunt,<sup>40</sup> 2007</b>              | 152  | 3                        | 248  | 3                        | 13.5  | 12 to 15 | N/A   | 12 to 15 | 66% | 66% | Universal | Secondary |
| <b>Jenson,<sup>73</sup> 2013</b>            | 395  | 14                       | 392  | 14                       | 9.82  | N/A      | 9.82  | N/A      | 52% | 52% | Universal | Primary   |
| <b>Ju,<sup>41</sup> 2009</b>                | 223  | 4                        | 121  | 4                        | N/A   | 8 to 11  | N/A   | 8 to 11  | 48% | 42% | Universal | Primary   |
| <b>Kaljee,<sup>42</sup> 2017</b>            | 1792 | 20                       | 1792 | 20                       | 11.0  | 9 to 13  | 10.6  | 8 to 13  | 58% | 52% | Universal | Primary   |
| <b>Karasimopoulou,<sup>74</sup> 2012</b>    | 128  | 12                       | 158  | 12                       | 11.0  | 10 to 12 | N/A   | 10 to 12 | 54% | 49% | Universal | Primary   |
| <b>Kärnä,<sup>43</sup> 2011</b>             | 4201 | 39                       | 3965 | 39                       | 11.0  | 10 to 12 | N/A   | 10 to 12 | 50% | 50% | Universal | Both      |
| <b>Kärnä,<sup>44</sup> 2013</b>             | 2230 | 40                       | 2086 | 39                       | N/A   | 8 to 9   | N/A   | 8 to 9   | N/A | N/A | Universal | Primary   |
| <b>Kathard,<sup>75</sup> 2014</b>           | 97   | 2                        | 114  | 1                        | 13.0  | N/A      | 13.0  | N/A      | 48% | 48% | Targeted  | Secondary |
| <b>Knowler,<sup>45</sup> 2013</b>           | 11   | 1                        | 12   | 1                        | 8.5   | 8 to 9   | N/A   | 8 to 9   | 9%  | 9%  | Targeted  | Primary   |
| <b>Mallick,<sup>61</sup> 2018</b>           | 223  | 5                        | 231  | 5                        | 13    | N/A      | 13    | N/A      | 57% | 58% | Universal | Primary   |

© 2020 American Medical Association. All rights reserved.

|                                           |      |                         |      |                         |       |          |       |          |     |     |           |           |
|-------------------------------------------|------|-------------------------|------|-------------------------|-------|----------|-------|----------|-----|-----|-----------|-----------|
| <b>Meraviglia,<sup>46</sup> 2003</b>      | 349  | 6                       | 380  | 6                       | 10.5  | 10 to 11 | N/A   | 10 to 11 | N/A | N/A | Universal | Primary   |
| <b>Meyer,<sup>76</sup> 2000</b>           | 6    | 1                       | 6    | 1                       | N/A   | 11 to 13 | N/A   | 11 to 13 | N/A | N/A | Targeted  | Primary   |
| <b>Midthassel,<sup>47</sup> 2008</b>      | 3441 | 22                      | 5381 | 28                      | N/A   | 12 to 14 | N/A   | 12 to 14 | N/A | N/A | Universal | Both      |
| <b>Moore,<sup>62</sup> 2018</b>           | 125  | N/A                     | 158  | N/A                     | 12.76 | 12 to 14 | 12.76 | 12 to 14 | 51% | 51% | Universal | Secondary |
| <b>Muñoz-Fernández,<sup>77</sup> 2019</b> | 557  | 4                       | 866  | 3                       | 14.88 | 11 to 19 | 15.04 | 11 to 19 | 54% | 51% | Universal | Both      |
| <b>Naidoo,<sup>78</sup> 2016</b>          | 191  | 8                       | 243  | 8                       | 16.9  | N/A      | 16.5  | N/A      | 48% | 40% | Universal | Secondary |
| <b>Nieh,<sup>79</sup> 2018</b>            | 241  | 8                       | 87   | 3                       | 11.5  | 11 to 12 | 11.5  | 11 to 12 | 59% | 40% | Universal | Primary   |
| <b>Nocentini,<sup>48</sup> 2016</b>       | 1039 | 7                       | 1003 | 7                       | 10.9  | N/A      | N/A   | N/A      | 49% | 49% | Universal | Primary   |
| <b>Nocentini,<sup>49</sup> 2018</b>       | 935  | 7 schools<br>51 classes | 955  | 6 schools<br>46 classes | 9.92  | N/A      | 9.93  | N/A      | 49% | 49% | Universal | Secondary |
| <b>Ostrov,<sup>50</sup> 2015</b>          | 56   | 8                       | 59   | 6                       | 3.6   | 3 to 5   | 4     | 3 to 5   | 46% | 44% | Universal | Primary   |
| <b>Pfetsch,<sup>80</sup> 2018</b>         | 256  | N/A                     | 254  | N/A                     | 13.5  | 12 to 16 | 13.5  | 12 to 16 | 52% | 52% | Universal | Secondary |
| <b>Sanchez,<sup>51</sup> 2001</b>         | 362  | 6                       | 385  | 6                       | N/A   | 10 to 11 | N/A   | 10 to 11 | 52% | 48% | Universal | Primary   |
| <b>Santos,<sup>52</sup> 2011</b>          | 445  | 24                      | 315  | 12                      | 8.5   | 4 to 13  | 8.5   | 4 to 13  | N/A | N/A | Universal | Both      |
| <b>Schechtman,<sup>63</sup> 2009</b>      | 60   | 13                      | 51   | 13                      | 12.5  | 11 to 14 | 12.5  | 11 to 14 | 50% | 50% | Universal | Both      |
| <b>Shams,<sup>81</sup> 2018</b>           | 147  | 2                       | 90   | 2                       | 13.73 | 12 to 16 | 13.73 | 12 to 16 | 64% | 64% | Universal | Secondary |
| <b>Sorrentino,<sup>53</sup> 2018</b>      | N/A  | 20                      | N/A  | 29                      | 12.14 | 11 to 17 | 12.14 | 11 to 17 | 54% | 54% | Universal | Secondary |
| <b>Stelko-Pereira,<sup>82</sup> 2015</b>  | 21   | 1                       | 50   | 1                       | 13    | 11 to 15 | 13    | 11 to 15 | 75% | 49% | Targeted  | Secondary |
| <b>Stevens,<sup>83</sup> 2000</b>         | 219  | 24                      | 229  | 24                      | N/A   | 13 to 16 | N/A   | 13 to 16 | N/A | N/A | Universal | Both      |
| <b>Swaim,<sup>84</sup> 2008</b>           | 712  | 3                       | 780  | 3                       | 13    | 12 to 14 | 13    | 12 to 14 | 57% | 48% | Universal | Secondary |
| <b>Tanrikulu,<sup>54</sup> 2015</b>       | 8    | 1                       | 8    | 1                       | 16    | 16       | 16    | 16       | 50% | 50% | Targeted  | Secondary |
| <b>Trip,<sup>55</sup> 2015</b>            | 270  | 3                       | 230  | 3                       | 11.8  | 10 to 14 | 11.8  | 10 to 14 | 44% | 51% | Universal | Secondary |
| <b>Tsiantis,<sup>56</sup> 2013</b>        | 333  | 10                      | 333  | 10                      | 10    | 9 to 12  | 10    | 9 to 12  | N/A | N/A | Universal | Primary   |
| <b>van den Berg,<sup>57</sup> 2012</b>    | 253  | 11                      | 398  | 16                      | 11.3  | 10 to 12 | 11.3  | 10 to 12 | 52% | 52% | Universal | Primary   |
| <b>Wójcik,<sup>85</sup> 2018</b>          | 43   | 6                       | 53   | 6                       | 13.8  | 12 to 15 | 13.7  | 12 to 15 | 53% | 42% | Universal | Secondary |
| <b>Yan,<sup>58</sup> 2019</b>             | 56   | 1                       | 58   | 1                       | 11.25 | 10 to 11 | 11.09 | 10 to 11 | 48% | 41% | Targeted  | Primary   |
| <b>Yeager,<sup>64</sup> 2012</b>          | 81   | 3                       | 162  | 6                       | 15    | 14 to 16 | 15    | 14 to 16 | 45% | 45% | Universal | Secondary |

Abbreviations: N/A, not available; y, years.



| eTable 6. Meta-analyses of efficacy of randomized-controlled trials testing anti-bullying school interventions per region |                     |               |                                                                               |    |                            |                                 |                                       |                       |               |                    |                  |                                       |
|---------------------------------------------------------------------------------------------------------------------------|---------------------|---------------|-------------------------------------------------------------------------------|----|----------------------------|---------------------------------|---------------------------------------|-----------------------|---------------|--------------------|------------------|---------------------------------------|
| Variable                                                                                                                  | Time of assessment  | Region        | Mean duration of intervention (mean length of follow-up, when applicable) (w) | k  | N of individuals on groups | N of individuals control groups | Meta-analysis                         |                       | Heterogeneity |                    | Publication bias |                                       |
|                                                                                                                           |                     |               |                                                                               |    |                            |                                 | Cohen's d, mean (95% CI) <sup>a</sup> | FDR corrected p-value | p-value (Q)   | I <sup>2</sup> (%) | Orwin's FSN      | Eggers regression intercept (p-value) |
| Overall bullying <sup>b</sup>                                                                                             | End of intervention | All countries | 32.6                                                                          | 45 | 46847                      | 45744                           | -0.150 (-0.191 to -0.109)             | <.001                 | <.001         | 85.3               | 209              | .026                                  |
|                                                                                                                           |                     | Europe        | 33.0                                                                          | 23 | 25453                      | 24939                           | -0.143 (-0.191 to -0.095)             | <.001                 | <.001         | 77.7               | 104              | .025                                  |
|                                                                                                                           |                     | North America | 30.3                                                                          | 13 | 9614                       | 9007                            | -0.170 (-0.290 to -0.050)             | .033                  | <.001         | 92.9               | 72               | .92                                   |
|                                                                                                                           | Follow-up           | All countries | 31.5 (44.0)                                                                   | 21 | 11020                      | 11977                           | -0.171 (-0.243 to -0.099)             | <.001                 | <.001         | 80.0               | 16               | .09                                   |
|                                                                                                                           |                     | Europe        | 24.6 (27.3)                                                                   | 6  | 2632                       | 2804                            | -0.154 (-0.263 to -0.045)             | .030                  | .04           | 57.9               | 5                | .20                                   |
|                                                                                                                           |                     | North America | 29.3 (58.2)                                                                   | 7  | 2744                       | 2847                            | -0.185 (-0.323 to -0.047)             | .035                  | <.001         | 84.5               | 9                | .45                                   |
| Bullying perpetration                                                                                                     | End of intervention | All countries | 35.9                                                                          | 35 | 43199                      | 42991                           | -0.111 (-0.146 to -0.077)             | <.001                 | <.001         | 78.8               | 558              | .006                                  |
|                                                                                                                           |                     | Europe        | 40.2                                                                          | 16 | 23632                      | 23662                           | -0.106 (-0.156 to -0.056)             | <.001                 | <.001         | 80.2               | 439              | .05                                   |
|                                                                                                                           |                     | North America | 30.3                                                                          | 13 | 9614                       | 9007                            | -0.114 (-0.184 to -0.044)             | .023                  | <.001         | 80.0               | 170              | .37                                   |
|                                                                                                                           | Follow-up           | All countries | 33.4 (39.2)                                                                   | 17 | 7889                       | 7993                            | -0.175 (-0.276 to -0.073)             | .029                  | <.001         | 85.9               | 49               | .18                                   |
|                                                                                                                           |                     | Europe        | 24.6 (27.3)                                                                   | 6  | 2632                       | 2804                            | -0.097 (-0.235 to 0.042)              | .21                   | .001          | 76.7               | N/A              | .25                                   |
|                                                                                                                           |                     | North America | 40.0 (65.8)                                                                   | 4  | 1151                       | 1109                            | -0.203 (-0.488 to 0.081)              | .20                   | <.001         | 91.1               | 16               | .41                                   |
| Bullying exposure                                                                                                         | End of intervention | All countries | 34.8                                                                          | 32 | 37190                      | 37001                           | -0.158 (-0.225 to -0.092)             | <.001                 | <.001         | 94.1               | 25               | .33                                   |
|                                                                                                                           |                     | Europe        | 37.9                                                                          | 17 | 23010                      | 23053                           | -0.142                                | <.001                 | <.001         | 82.8               | 91               | .27                                   |

© 2020 American Medical Association. All rights reserved.

|                                    |                     |               |             |    |       |       |                              |       |       |      |     |      |     |
|------------------------------------|---------------------|---------------|-------------|----|-------|-------|------------------------------|-------|-------|------|-----|------|-----|
|                                    |                     |               |             |    |       |       | (-0.194 to -0.090)           |       |       |      |     |      |     |
|                                    |                     | North America | 29.8        | 8  | 3798  | 3505  | -0.209<br>(-0.563 to 0.145)  | .28   | <.001 | 97.6 | 37  | .15  |     |
|                                    | Follow-up           | All countries | 23.5 (40.9) | 13 | 6971  | 7629  | -0.122<br>(-0.173 to -0.071) | <.001 | .06   | 41.3 | 12  | .20  |     |
|                                    |                     | Europe        | 28.0 (31.2) | 5  | 2175  | 2532  | -0.147<br>(-0.272 to -0.022) | .032  | <.001 | 85.4 | N/A | .48  |     |
|                                    |                     | North America | 11.0 (46.0) | 4  | 1780  | 1932  | -0.148<br>(-0.210 to -0.087) | <.001 | .92   | 0    | 5   | .10  |     |
| Cyberbullying <sup>c</sup>         | End of intervention | All countries | 33.4        | 5  | 3271  | 2472  | -0.135<br>(-0.201 to -0.069) | <.001 | .29   | 19.7 | 5   | .34  |     |
|                                    |                     | Europe        | 21.7        | 4  | 1723  | 1175  | -0.182<br>(-0.259 to -0.104) | <.001 | .73   | 0    | 4   | .76  |     |
|                                    |                     | North America | N/A         | 0  | N/A   | N/A   | N/A                          | N/A   | N/A   | N/A  | N/A | N/A  |     |
|                                    | Follow-up           | All countries | 78.0 (52.0) | 1  | N/A   | N/A   | N/A                          | N/A   | N/A   | N/A  | N/A | N/A  | N/A |
|                                    |                     | Europe        | N/A         | 0  | N/A   | N/A   | N/A                          | N/A   | N/A   | N/A  | N/A | N/A  | N/A |
|                                    |                     | North America | N/A         | 0  | N/A   | N/A   | N/A                          | N/A   | N/A   | N/A  | N/A | N/A  | N/A |
| Attitudes that discourage bullying | End of intervention | All countries | 27.7        | 25 | 20537 | 17778 | 0.195<br>(0.145 to 0.245)    | <.001 | <.001 | 78.4 | 4   | .007 |     |
|                                    |                     | Europe        | 25.7        | 15 | 14644 | 12314 | 0.243<br>(0.164 to 0.323)    | <.001 | <.001 | 86.1 | 2   | .01  |     |
|                                    |                     | North America | 23.7        | 6  | 3418  | 2913  | 0.110<br>(0.063 to 0.157)    | <.001 | .93   | 0    | 1   | .79  |     |
|                                    | Follow-up           | All countries | 34.8 (50.1) | 14 | 5517  | 4596  | 0.143<br>(0.083 to 0.202)    | <.001 | .011  | 52.5 | 2   | .06  |     |
|                                    |                     | Europe        | 40.0 (44.0) | 6  | 1777  | 1053  | 0.181<br>(0.070 to 0.291)    | .023  | .07   | 51.1 | 2   | .63  |     |
|                                    |                     | North America | 13.5 (78.0) | 4  | 2056  | 2069  | 0.093<br>(0.001 to 0.184)    | .007  | .039  | 64.1 | N/A | .048 |     |
| Attitudes that encourage bullying  | End of intervention | All countries | 27.1        | 15 | 15884 | 14037 | -0.115<br>(-0.184 to -0.046) | .039  | <.001 | 85.2 | 14  | .58  |     |
|                                    |                     | Europe        | 30.4        | 10 | 14161 | 12452 | -0.155<br>(-0.242 to -0.068) | <.001 | <.001 | 89.6 | 8   | .31  |     |

© 2020 American Medical Association. All rights reserved.

|                        |                     |               |             |    |       |       |                              |       |       |      |     |       |
|------------------------|---------------------|---------------|-------------|----|-------|-------|------------------------------|-------|-------|------|-----|-------|
|                        | Follow-up           | North America | 12.5        | 4  | 1571  | 1337  | -0.016<br>(-0.122 to 0.090)  | .78   | .14   | 45.0 | N/A | .68   |
|                        |                     | All countries | 19.2 (48.6) | 7  | 3329  | 3299  | -0.123<br>(-0.197 to -0.048) | .002  | .07   | 48.6 | 69  | .69   |
|                        |                     | Europe        | 48.0 (36.0) | 3  | 1621  | 1431  | -0.091<br>(-0.194 to -0.012) | .11   | .27   | 24.0 | N/A | .52   |
|                        |                     | North America | 6.0 (65.0)  | 3  | 1611  | 1754  | -0.168<br>(-0.232 to -0.104) | <.001 | .535  | 0.0  | 12  | .16   |
| Mental health problems | End of intervention | All countries | 25.7        | 20 | 14543 | 14649 | -0.205<br>(-0.277 to -0.133) | <.001 | <.001 | 83.7 | 10  | <.001 |
|                        |                     | Europe        | 32.8        | 10 | 9946  | 9942  | -0.278<br>(-0.405 to -0.150) | <.001 | <.001 | 92.5 | 12  | .03   |
|                        |                     | North America | 14.8        | 4  | 3615  | 3665  | -0.118<br>(-0.236 to -0.001) | .050  | .048  | 62.1 | 2   | .007  |
|                        | Follow-up           | All countries | 20.8 (27.3) | 6  | 1605  | 1621  | -0.202<br>(-0.347 to -0.056) | .010  | .012  | 65.7 | 4   | .001  |
|                        |                     | Europe        | 14.5 (19.3) | 3  | 833   | 1015  | -0.259<br>(-0.603 to 0.085)  | .18   | .010  | 78.5 | 4   | .09   |
|                        |                     | North America | N/A         | 0  | N/A   | N/A   | N/A                          | N/A   | N/A   | N/A  | N/A | N/A   |
| School climate         | End of intervention | All countries | 36.5        | 12 | 11417 | 11995 | 0.070<br>(0.044 to 0.096)    | <.001 | .70   | 0    | N/A | .02   |
|                        |                     | Europe        | 51.5        | 4  | 3629  | 4001  | 0.049<br>(0.006 to 0.093)    | .034  | .87   | 0    | N/A | .29   |
|                        |                     | North America | 26.0        | 4  | 1928  | 2055  | 0.147<br>(0.069 to 0.226)    | <.001 | .81   | 0    | 1   | .59   |
|                        | Follow-up           | All countries | 18.8 (62.4) | 5  | 2647  | 2978  | 0.135<br>(0.037 to 0.233)    | .031  | .006  | 72.0 | 1   | .923  |
|                        |                     | Europe        | N/A         | 1  | N/A   | N/A   | N/A                          | N/A   | N/A   | N/A  | N/A | N/A   |
|                        |                     | North America | 6.0 (69.3)  | 3  | 1611  | 1754  | 0.197<br>(0.091 to 0.304)    | <.001 | .07   | 62.0 | 1   | .97   |

a. Positive Cohen's d values mean that the anti-bullying intervention is associated with an increase in the outcome variable, while negative Cohen's d values mean that the anti-bullying intervention is associated with a decrease in the outcome variable.

b. Overall bullying is a pooled measure including traditional bullying perpetration, traditional bullying exposure, and cyberbullying.

c. Cyberbullying reports pooled cyberbullying perpetration and cyberbullying exposure data.

Abbreviations: CI, confidence interval; FSN, fail safe number; k, number of samples; N, number; N/A, not applicable; w, weeks.

| <b>eTable 7. Population impact number of universal anti-bullying school interventions per region</b> |                     |                       |                 |                     |                                                   |                                                    |                                                    |                                                    |
|------------------------------------------------------------------------------------------------------|---------------------|-----------------------|-----------------|---------------------|---------------------------------------------------|----------------------------------------------------|----------------------------------------------------|----------------------------------------------------|
| <b>Variable</b>                                                                                      | <b>Assessed at</b>  | <b>Country region</b> | <b><i>k</i></b> | <b>NNT (95% CI)</b> | <b>PIN for bullying prevalence of 5% (95% CI)</b> | <b>PIN for bullying prevalence of 10% (95% CI)</b> | <b>PIN for bullying prevalence of 15% (95% CI)</b> | <b>PIN for bullying prevalence of 20% (95% CI)</b> |
| Overall bullying <sup>a</sup>                                                                        | End of intervention | All countries         | 39              | 22 (17 to 32)       | 440 (340 to 640)                                  | 220 (170 to 320)                                   | 147 (113 to 213)                                   | 110 (85 to 160)                                    |
|                                                                                                      |                     | Europe                | 20              | 24 (17 to 36)       | 480 (340 to 720)                                  | 240 (170 to 360)                                   | 160 (113 to 240)                                   | 120 (85 to 180)                                    |
|                                                                                                      |                     | North America         | 11              | 20 (11 to 70)       | 400 (220 to 1400)                                 | 200 (110 to 700)                                   | 133 (73 to 467)                                    | 100 (55 to 350)                                    |
|                                                                                                      | Follow-up           | All countries         | 17              | 19 (13 to 37)       | 380 (260 to 740)                                  | 190 (130 to 370)                                   | 127 (87 to 247)                                    | 95 (65 to 185)                                     |
|                                                                                                      |                     | Europe                | 6               | 22 (12 to 78)       | 440 (240 to 1560)                                 | 220 (120 to 780)                                   | 147 (80 to 520)                                    | 110 (60 to 390)                                    |
|                                                                                                      |                     | North America         | 5               | 15 (8 to 71)        | 300 (160 to 1420)                                 | 150 (80 to 710)                                    | 100 (53 to 473)                                    | 75 (40 to 355)                                     |
| Bullying perpetration                                                                                | End of intervention | All countries         | 33              | 31 (23 to 46)       | 620 (460 to 920)                                  | 310 (230 to 460)                                   | 207 (153 to 307)                                   | 155 (115 to 230)                                   |
|                                                                                                      |                     | Europe                | 16              | 32 (22 to 62)       | 640 (440 to 1240)                                 | 320 (220 to 620)                                   | 213 (147 to 413)                                   | 160 (110 to 310)                                   |
|                                                                                                      |                     | North America         | 11              | 31 (17 to 104)      | 620 (340 to 2080)                                 | 310 (170 to 1040)                                  | 207 (113 to 693)                                   | 155 (85 to 520)                                    |
|                                                                                                      | Follow-up           | All countries         | 14              | 19 (11 to 56)       | 380 (220 to 1120)                                 | 190 (110 to 560)                                   | 127 (73 to 373)                                    | 95 (55 to 280)                                     |
|                                                                                                      |                     | Europe                | 6               | 35 (14 to 3656)     | 700 (280 to 73120)                                | 350 (140 to 36560)                                 | 233 (93 to 24373)                                  | 175 (70 to 18280)                                  |
|                                                                                                      |                     | North America         | 3               | 12 (5 to 3641)      | 240 (100 to 72820)                                | 120 (50 to 36410)                                  | 80 (33 to 24273)                                   | 60 (25 to 18205)                                   |
| Bullying exposure                                                                                    | End of intervention | All countries         | 27              | 21 (14 to 39)       | 420 (280 to 780)                                  | 210 (140 to 390)                                   | 140 (93 to 260)                                    | 105 (70 to 195)                                    |
|                                                                                                      |                     | Europe                | 15              | 24 (17 to 40)       | 480 (340 to 800)                                  | 240 (170 to 600)                                   | 160 (113 to 267)                                   | 120 (85 to 200)                                    |
|                                                                                                      |                     | North America         | 6               | 14 (5 to 3587)      | 280 (80 to 71740)                                 | 140 (40 to 35870)                                  | 93 (27 to 23913)                                   | 70 (20 to 17935)                                   |
|                                                                                                      | Follow-up           | All countries         | 10              | 53 (22 to 3779)     | 1060 (440 to 75580)                               | 530 (220 to 37790)                                 | 353 (147 to 25193)                                 | 265 (110 to 18895)                                 |
|                                                                                                      |                     | Europe                | 5               | 141 (15 to 3591)    | 2820 (300 to 71820)                               | 1410 (150 to 35910)                                | 940 (100 to 23940)                                 | 705 (75 to 17955)                                  |
|                                                                                                      |                     | North America         | 2               | N/A                 | N/A                                               | N/A                                                | N/A                                                | N/A                                                |
| Cyberbullying <sup>b</sup>                                                                           | End of intervention | All countries         | 4               | 25 (15 to 54)       | 500 (300 to 1080)                                 | 250 (150 to 540)                                   | 167 (100 to 360)                                   | 125 (75 to 270)                                    |
|                                                                                                      |                     | Europe                | 3               | 19 (13 to 34)       | 380 (260 to 680)                                  | 190 (130 to 340)                                   | 127 (87 to 227)                                    | 95 (65 to 170)                                     |
|                                                                                                      |                     | North America         | 1               | N/A                 | N/A                                               | N/A                                                | N/A                                                | N/A                                                |
|                                                                                                      | Follow-up           | All countries         | 1               | N/A                 | N/A                                               | N/A                                                | N/A                                                | N/A                                                |

© 2020 American Medical Association. All rights reserved.

|                                    |                     |               |    |                  |                     |                     |                     |                     |
|------------------------------------|---------------------|---------------|----|------------------|---------------------|---------------------|---------------------|---------------------|
|                                    |                     | Europe        | 0  | N/A              | N/A                 | N/A                 | N/A                 | N/A                 |
|                                    |                     | North America | 0  | N/A              | N/A                 | N/A                 | N/A                 | N/A                 |
| Attitudes that discourage bullying | End of intervention | All countries | 21 | 17 (14 to 24)    | 340 (280 to 480)    | 170 (140 to 240)    | 113 (93 to 160)     | 85 (70 to 120)      |
|                                    |                     | Europe        | 13 | 15 (11 to 22)    | 300 (220 to 440)    | 150 (110 to 220)    | 100 (73 to 147)     | 75 (55 to 110)      |
|                                    |                     | North America | 4  | 33 (22 to 67)    | 660 (440 to 1340)   | 330 (220 to 670)    | 220 (147 to 447)    | 165 (110 to 335)    |
|                                    | Follow-up           | All countries | 13 | 26 (17 to 50)    | 520 (340 to 1000)   | 260 (170 to 500)    | 173 (113 to 333)    | 130 (85 to 250)     |
|                                    |                     | Europe        | 6  | 18 (11 to 50)    | 360 (220 to 1000)   | 180 (110 to 500)    | 120 (73 to 333)     | 90 (55 to 250)      |
|                                    |                     | North America | 3  | 71 (32 to 3965)  | 1420 (640 to 79300) | 710 (320 to 39650)  | 473 (213 to 26433)  | 355 (160 to 19825)  |
| Attitudes that encourage bullying  | End of intervention | All countries | 14 | 29 (17 to 71)    | 580 (340 to 1420)   | 290 (170 to 710)    | 193 (113 to 473)    | 145 (85 to 355)     |
|                                    |                     | Europe        | 10 | 21 (13 to 51)    | 420 (260 to 1020)   | 210 (130 to 510)    | 140 (87 to 340)     | 105 (65 to 255)     |
|                                    |                     | North America | 3  | 222 (23 to 3600) | 4440 (460 to 72000) | 2220 (230 to 36000) | 1480 (153 to 24000) | 1110 (115 to 18000) |
|                                    | Follow-up           | All countries | 5  | 28 (19 to 55)    | 560 (380 to 1100)   | 280 (190 to 550)    | 187 (127 to 367)    | 140 (95 to 275)     |
|                                    |                     | Europe        | 3  | 38 (17 to 3866)  | 760 (340 to 77320)  | 380 (170 to 38660)  | 253 (113 to 25773)  | 190 (85 to 19330)   |
|                                    |                     | North America | 2  | N/A              | N/A                 | N/A                 | N/A                 | N/A                 |
| Mental health problems             | End of intervention | All countries | 15 | 16 (11 to 26)    | 320 (220 to 520)    | 160 (110 to 260)    | 107 (73 to 173)     | 80 (55 to 110)      |
|                                    |                     | Europe        | 8  | 12 (8 to 22)     | 240 (160 to 440)    | 120 (80 to 220)     | 80 (53 to 147)      | 60 (40 to 110)      |
|                                    |                     | North America | 4  | 29 (14 to 3570)  | 580 (280 to 71400)  | 290 (140 to 35700)  | 193 (93 to 23800)   | 145 (70 to 17850)   |
|                                    | Follow-up           | All countries | 5  | 16 (8 to 118)    | 320 (160 to 2360)   | 160 (80 to 1180)    | 107 (53 to 787)     | 80 (40 to 590)      |
|                                    |                     | Europe        | 3  | 13 (5 to 3611)   | 260 (100 to 72220)  | 130 (50 to 36110)   | 87 (33 to 24073)    | 65 (25 to 18055)    |
|                                    |                     | North America | 0  | N/A              | N/A                 | N/A                 | N/A                 | N/A                 |
| School climate                     | End of intervention | All countries | 9  | 52 (37 to 88)    | 1040 (740 to 1760)  | 520 (370 to 880)    | 347 (247 to 587)    | 260 (185 to 440)    |
|                                    |                     | Europe        | 4  | 71 (37 to 594)   | 1420 (740 to 11880) | 710 (370 to 5940)   | 473 (247 to 3960)   | 355 (185 to 2970)   |
|                                    |                     | North America | 2  | N/A              | N/A                 | N/A                 | N/A                 | N/A                 |
|                                    | Follow-up           | All countries | 4  | 28 (14 to 1190)  | 560 (280 to 23800)  | 280 (140 to 11900)  | 187 (93 to 7933)    | 140 (70 to 5950)    |
|                                    |                     | Europe        | 1  | N/A              | N/A                 | N/A                 | N/A                 | N/A                 |

© 2020 American Medical Association. All rights reserved.

|                                                                                                                                                                                                                                                                                                                                                                                                                                                                                                |  |               |   |     |     |     |     |     |
|------------------------------------------------------------------------------------------------------------------------------------------------------------------------------------------------------------------------------------------------------------------------------------------------------------------------------------------------------------------------------------------------------------------------------------------------------------------------------------------------|--|---------------|---|-----|-----|-----|-----|-----|
|                                                                                                                                                                                                                                                                                                                                                                                                                                                                                                |  | North America | 2 | N/A | N/A | N/A | N/A | N/A |
| <p>a. Overall bullying is a pooled measure including traditional bullying perpetration, traditional bullying exposure, and cyberbullying.</p> <p>b. Cyberbullying reports pooled cyberbullying perpetration and cyberbullying exposure data.</p> <p>Abbreviations: CI, confidence interval; N/A, not applicable; NNT, number needed to treat; PIN, population impact number (PIN is defined as children in the total population for whom one event will be prevented by the intervention).</p> |  |               |   |     |     |     |     |     |

| eTable 8. Meta-analyses of efficacy of randomized-controlled trials testing universal or targeted anti-bullying school interventions |                     |                       |                                                                               |    |                                      |                                 |                                       |                       |               |                    |                  |                                       |
|--------------------------------------------------------------------------------------------------------------------------------------|---------------------|-----------------------|-------------------------------------------------------------------------------|----|--------------------------------------|---------------------------------|---------------------------------------|-----------------------|---------------|--------------------|------------------|---------------------------------------|
| Variable                                                                                                                             | Time of assessment  | Universal or targeted | Mean duration of intervention (mean length of follow-up, when applicable) (w) | k  | N of individuals intervention groups | N of individuals control groups | Meta-analysis                         |                       | Heterogeneity |                    | Publication bias |                                       |
|                                                                                                                                      |                     |                       |                                                                               |    |                                      |                                 | Cohen's d, mean (95% CI) <sup>a</sup> | FDR corrected p-value | p-value (Q)   | I <sup>2</sup> (%) | Orwin's FSN      | Eggers regression intercept (p-value) |
| Overall bullying <sup>b</sup>                                                                                                        | End of intervention | All studies           | 32.6                                                                          | 45 | 46847                                | 45744                           | -0.150 (-0.191 to -0.109)             | <.001                 | <.001         | 85.3               | 209              | .026                                  |
|                                                                                                                                      |                     | Universal studies     | 35.2                                                                          | 39 | 46289                                | 45385                           | -0.150 (-0.192 to -0.107)             | <.001                 | <.001         | 87.3               | 186              | .030                                  |
|                                                                                                                                      |                     | Targeted studies      | 15.5                                                                          | 6  | 558                                  | 359                             | -0.131 (-0.254 to -0.008)             | .06                   | .89           | 0                  | 33               | .05                                   |
|                                                                                                                                      | Follow-up           | All studies           | 31.5 (44.0)                                                                   | 21 | 11020                                | 11977                           | -0.171 (-0.243 to -0.099)             | <.001                 | <.001         | 80.0               | 16               | .09                                   |
|                                                                                                                                      |                     | Universal studies     | 35.9 (46.1)                                                                   | 17 | 10608                                | 10549                           | -0.260 (-0.253 to -0.094)             | <.001                 | <.001         | 83.4               | 9                | .13                                   |
|                                                                                                                                      |                     | Targeted studies      | 14.0 (32.0)                                                                   | 4  | 412                                  | 428                             | -0.125 (-0.259 to 0.010)              | .09                   | .33           | 12.7               | 4                | .11                                   |
| Bullying perpetration                                                                                                                | End of intervention | All studies           | 35.9                                                                          | 35 | 43199                                | 42991                           | -0.111 (-0.146 to -0.077)             | <.001                 | <.001         | 78.8               | 558              | .006                                  |
|                                                                                                                                      |                     | Universal studies     | 36.5                                                                          | 33 | 42727                                | 42721                           | -0.111 (-0.147 to -0.075)             | <.001                 | <.001         | 79.9               | 554              | .008                                  |
|                                                                                                                                      |                     | Targeted studies      | 26.0                                                                          | 2  | 472                                  | 270                             | -0.105 (-0.222 to 0.012)              | .10                   | .36           | 0                  | N/A              | N/A                                   |
|                                                                                                                                      | Follow-up           | All studies           | 33.4 (39.2)                                                                   | 17 | 7889                                 | 7993                            | -0.175 (-0.276 to -0.073)             | .049                  | <.001         | 85.9               | 49               | .18                                   |
|                                                                                                                                      |                     | Universal studies     | 38.0 (41.1)                                                                   | 14 | 7646                                 | 7743                            | -0.173 (-0.284 to -0.062)             | .004                  | <.001         | 88.1               | 42               | .25                                   |
|                                                                                                                                      |                     | Targeted studies      | 13.3 (44.0)                                                                   | 3  | 243                                  | 250                             | -0.240 (-0.619 to 0.139)              | .26                   | <.001         | 91.1               | 4                | .41                                   |
| Bullying exposure                                                                                                                    | End of intervention | All studies           | 34.8                                                                          | 32 | 37190                                | 37001                           | -0.158 (-0.225 to -0.092)             | <.001                 | <.001         | 94.1               | 25               | .33                                   |

© 2020 American Medical Association. All rights reserved.

|                                    |                     |                   |             |    |       |       |                              |       |       |      |     |      |
|------------------------------------|---------------------|-------------------|-------------|----|-------|-------|------------------------------|-------|-------|------|-----|------|
|                                    |                     | Universal studies | 37.9        | 27 | 36878 | 36650 | -0.158<br>(-0.229 to -0.088) | <.001 | <.001 | 95.0 | 21  | .34  |
|                                    |                     | Targeted studies  | 17.6        | 5  | 312   | 351   | -0.127<br>(-0.263 to 0.009)  | .09   | .87   | 0    | 43  | .17  |
|                                    | Follow-up           | All studies       | 23.5 (40.9) | 13 | 6971  | 7629  | -0.122<br>(-0.173 to -0.071) | <.001 | .06   | 41.3 | 12  | .20  |
|                                    |                     | Universal studies | 29.6 (39.8) | 10 | 6594  | 7207  | -0.118<br>(-0.176 to -0.061) | <.001 | .038  | 49.3 | 10  | .41  |
|                                    |                     | Targeted studies  | 14.7 (32.0) | 3  | 377   | 422   | -0.149<br>(-0.280 to -0.018) | .048  | .32   | 13.4 | 16  | .49  |
| Cyberbullying <sup>c</sup>         | End of intervention | All studies       | 33.4        | 5  | 3271  | 2472  | -0.135<br>(-0.201 to -0.069) | <.001 | .29   | 19.7 | 5   | .34  |
|                                    |                     | Universal studies | 40.5        | 4  | 3263  | 2464  | -0.138<br>(-0.213 to -0.064) | <.001 | .19   | 37.1 | 4   | .38  |
|                                    |                     | Targeted studies  | 5.0         | 1  | N/A   | N/A   | N/A                          | N/A   | N/A   | N/A  | N/A | N/A  |
|                                    | Follow-up           | All studies       | 78.0 (52.0) | 1  | N/A   | N/A   | N/A                          | N/A   | N/A   | N/A  | N/A | N/A  |
|                                    |                     | Universal studies | 78.0 (52.0) | 1  | N/A   | N/A   | N/A                          | N/A   | N/A   | N/A  | N/A | N/A  |
|                                    |                     | Targeted studies  | N/A         | 0  | N/A   | N/A   | N/A                          | N/A   | N/A   | N/A  | N/A | N/A  |
| Attitudes that discourage bullying | End of intervention | All studies       | 27.7        | 25 | 20537 | 17778 | 0.195<br>(0.145 to 0.245)    | <.001 | <.001 | 78.4 | 4   | .007 |
|                                    |                     | Universal studies | 29.3        | 21 | 19964 | 17485 | 0.190<br>(0.142 to 0.239)    | <.001 | <.001 | 77.3 | 3   | .020 |
|                                    |                     | Targeted studies  | 19.0        | 4  | 573   | 293   | 0.614<br>(0.013 to 1.216)    | .07   | <.001 | 86.7 | 1   | .30  |
|                                    | Follow-up           | All studies       | 34.8 (50.1) | 14 | 5517  | 4596  | 0.143<br>(0.083 to 0.202)    | <.001 | .011  | 52.5 | 2   | .06  |
|                                    |                     | Universal studies | 36.4 (50.0) | 13 | 5330  | 4402  | 0.130<br>(0.070 to 0.190)    | <.001 | .026  | 48.4 | 1   | .06  |
|                                    |                     | Targeted studies  | N/A         | 1  | N/A   | N/A   | N/A                          | N/A   | N/A   | N/A  | N/A | N/A  |
| Attitudes that encourage bullying  | End of intervention | All studies       | 27.1        | 15 | 15884 | 14037 | -0.115<br>(-0.184 to -0.046) | .039  | <.001 | 85.2 | 14  | .58  |
|                                    |                     | Universal studies | 27.9        | 14 | 15459 | 13843 | -0.119<br>(-0.190 to -0.049) | .040  | <.001 | 86.6 | 13  | .52  |

© 2020 American Medical Association. All rights reserved.



|                                                                                                                                                                                                                                                                                                                                                                                                                                                                                                                                                                                                                                                             |                     |                   |             |    |       |       |                              |       |       |      |     |       |
|-------------------------------------------------------------------------------------------------------------------------------------------------------------------------------------------------------------------------------------------------------------------------------------------------------------------------------------------------------------------------------------------------------------------------------------------------------------------------------------------------------------------------------------------------------------------------------------------------------------------------------------------------------------|---------------------|-------------------|-------------|----|-------|-------|------------------------------|-------|-------|------|-----|-------|
|                                                                                                                                                                                                                                                                                                                                                                                                                                                                                                                                                                                                                                                             |                     | Targeted studies  | N/A         | 1  | N/A   | N/A   | N/A                          | N/A   | N/A   | N/A  | N/A | N/A   |
|                                                                                                                                                                                                                                                                                                                                                                                                                                                                                                                                                                                                                                                             | Follow-up           | All studies       | 19.2 (48.6) | 7  | 3329  | 3299  | -0.123<br>(-0.197 to -0.048) | .004  | .07   | 48.6 | 69  | .69   |
|                                                                                                                                                                                                                                                                                                                                                                                                                                                                                                                                                                                                                                                             |                     | Universal studies | 24.5 (52.8) | 5  | 3045  | 2991  | -0.120<br>(-0.177 to -0.063) | <.001 | .36   | 9.1  | 55  | .68   |
|                                                                                                                                                                                                                                                                                                                                                                                                                                                                                                                                                                                                                                                             |                     | Targeted studies  | 8.5 (38.0)  | 2  | 284   | 308   | -0.047<br>(-0.451 to 0.356)  | .82   | .008  | 85.9 | N/A | N/A   |
| Mental health problems                                                                                                                                                                                                                                                                                                                                                                                                                                                                                                                                                                                                                                      | End of intervention | All studies       | 25.7        | 20 | 14543 | 14649 | -0.205<br>(-0.277 to -0.133) | <.001 | <.001 | 83.7 | 10  | <.001 |
|                                                                                                                                                                                                                                                                                                                                                                                                                                                                                                                                                                                                                                                             |                     | Universal studies | 28.3        | 15 | 14231 | 14298 | -0.211<br>(-0.292 to -0.131) | <.001 | <.001 | 87.7 | 7   | .001  |
|                                                                                                                                                                                                                                                                                                                                                                                                                                                                                                                                                                                                                                                             |                     | Targeted studies  | 17.6        | 5  | 312   | 351   | -0.182<br>(-0.292 to -0.071) | .002  | .99   | 0    | 18  | .47   |
|                                                                                                                                                                                                                                                                                                                                                                                                                                                                                                                                                                                                                                                             | Follow-up           | All studies       | 20.8 (27.3) | 6  | 1605  | 1621  | -0.202<br>(-0.347 to -0.056) | .010  | .012  | 65.7 | 4   | .001  |
|                                                                                                                                                                                                                                                                                                                                                                                                                                                                                                                                                                                                                                                             |                     | Universal studies | 22.0 (22.4) | 5  | 1418  | 1427  | -0.205<br>(-0.381 to -0.030) | .037  | .010  | 69.9 | 3   | .003  |
|                                                                                                                                                                                                                                                                                                                                                                                                                                                                                                                                                                                                                                                             |                     | Targeted studies  | N/A         | 1  | N/A   | N/A   | N/A                          | N/A   | N/A   | N/A  | N/A | N/A   |
| School climate                                                                                                                                                                                                                                                                                                                                                                                                                                                                                                                                                                                                                                              | End of intervention | All studies       | 36.5        | 12 | 11417 | 11995 | 0.070<br>(0.044 to 0.096)    | <.001 | .70   | 0    | N/A | .02   |
|                                                                                                                                                                                                                                                                                                                                                                                                                                                                                                                                                                                                                                                             |                     | Universal studies | 41.6        | 9  | 11127 | 11667 | 0.067<br>(0.040 to 0.094)    | <.001 | .56   | 0    | N/A | .11   |
|                                                                                                                                                                                                                                                                                                                                                                                                                                                                                                                                                                                                                                                             |                     | Targeted studies  | 21.3        | 3  | 290   | 328   | 0.128<br>(0.014 to 0.242)    | .049  | .87   | 0    | 1   | .26   |
|                                                                                                                                                                                                                                                                                                                                                                                                                                                                                                                                                                                                                                                             | Follow-up           | All studies       | 18.8 (62.4) | 5  | 2647  | 2978  | 0.135<br>(0.037 to 0.233)    | .05   | .006  | 72.0 | 1   | .923  |
|                                                                                                                                                                                                                                                                                                                                                                                                                                                                                                                                                                                                                                                             |                     | Universal studies | 19.5 (65.0) | 4  | 2460  | 2784  | 0.120<br>(0.003 to 0.236)    | .07   | .004  | 77.3 | 1   | .72   |
|                                                                                                                                                                                                                                                                                                                                                                                                                                                                                                                                                                                                                                                             |                     | Targeted studies  | N/A         | 1  | N/A   | N/A   | N/A                          | N/A   | N/A   | N/A  | N/A | N/A   |
| <p>a. Positive Cohen's d values mean that the anti-bullying intervention is associated with an increase in the outcome variable, while negative Cohen's d values mean that the anti-bullying intervention is associated with a decrease in the outcome variable.</p> <p>b. Overall bullying is a pooled measure including traditional bullying perpetration, traditional bullying exposure, and cyberbullying.</p> <p>c. Cyberbullying reports pooled cyberbullying perpetration and cyberbullying exposure data.</p> <p>Abbreviations: CI, confidence interval; FSN, fail safe number; k, number of samples; N, number; N/A, not applicable; w, weeks.</p> |                     |                   |             |    |       |       |                              |       |       |      |     |       |

© 2020 American Medical Association. All rights reserved.

eFigure 2. Efficacy of anti-bullying interventions on overall bullying at study follow-up

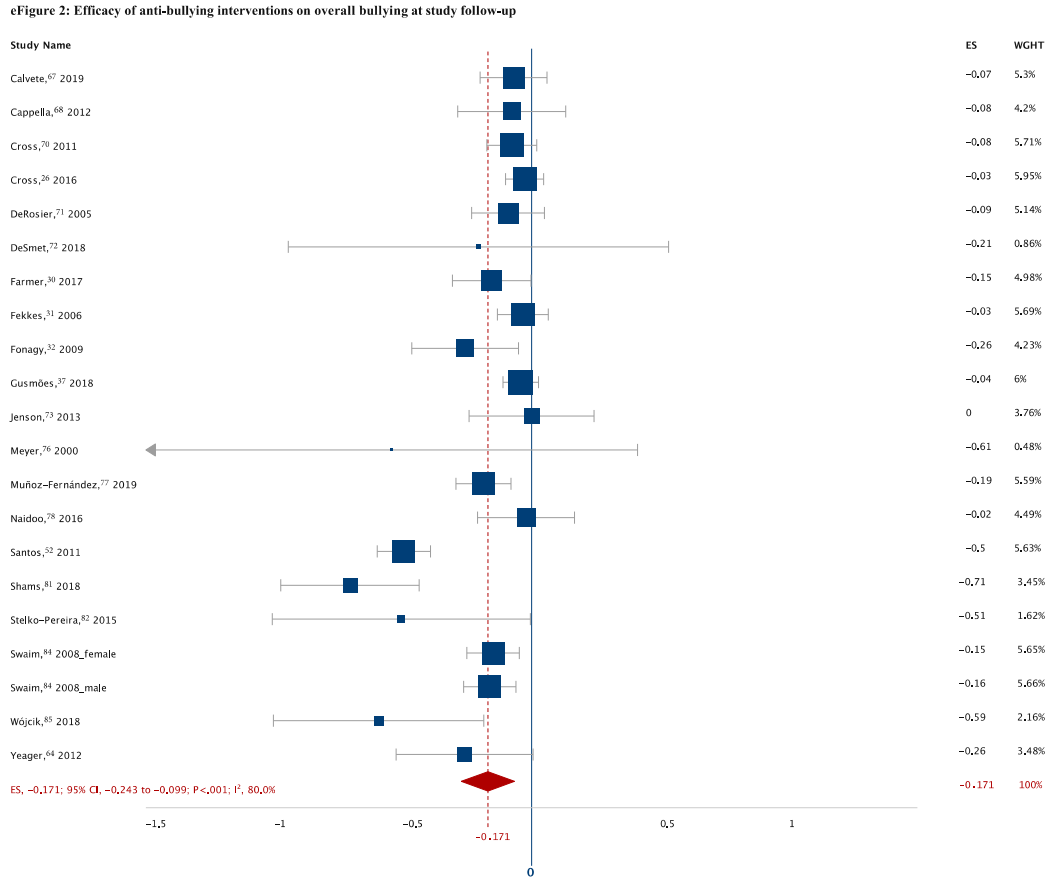

© 2020 American Medical Association. All rights reserved.

Legend: Meta-analysis of effect on overall bullying (as a pooled measure including bullying perpetration, bullying exposure, and cyberbullying) at study follow-up. Mean follow-up was 43.2 weeks (range 3 to 104 weeks).

Abbreviations: CI, confidence interval.

eFigure 3. Efficacy of anti-bullying interventions on mental health problems at study follow-up

eFigure 3: Efficacy of anti-bullying interventions on mental health problems at follow-up

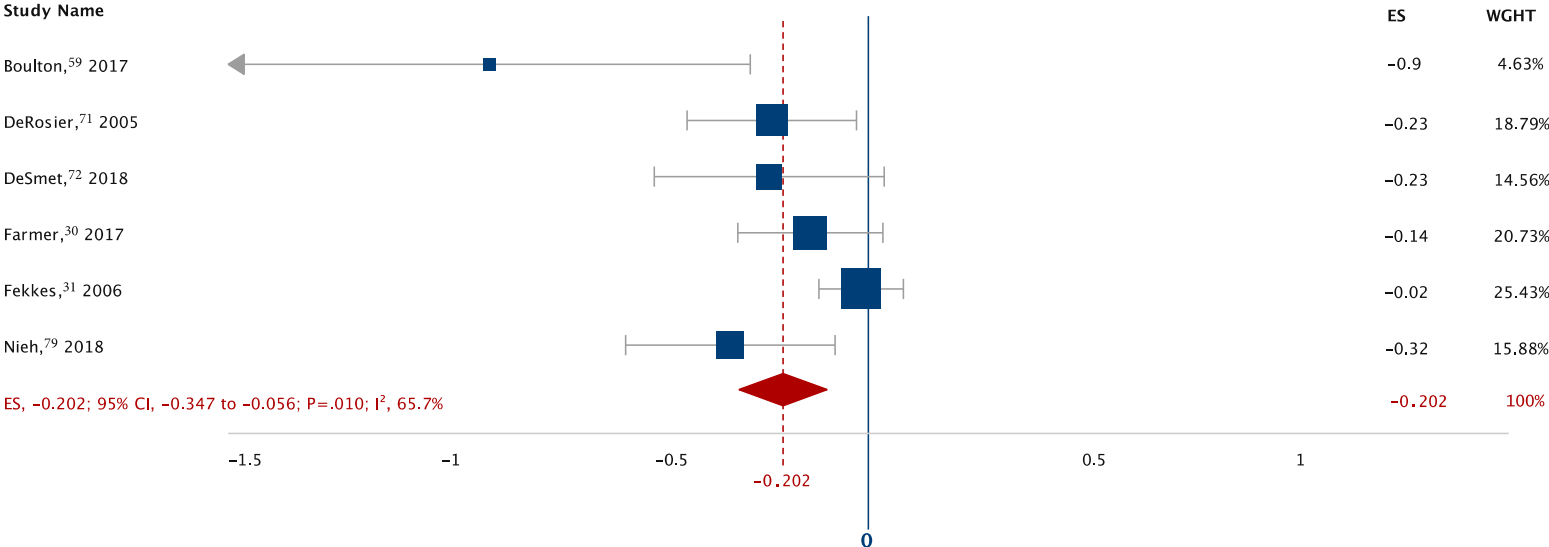

Legend: Meta-analysis of effect on mental health problems at follow-up. Mean follow-up was 27.3 weeks (range 2 to 52 weeks).

Abbreviations: CI, confidence interval.

| <b>eTable 9. Meta-Regression Analyses (Association Between Variables and Effect Size of Anti-Bullying Interventions)</b> |                    |                                    |          |                                             |                |                                  |
|--------------------------------------------------------------------------------------------------------------------------|--------------------|------------------------------------|----------|---------------------------------------------|----------------|----------------------------------|
| <b>Variable</b>                                                                                                          | <b>Assessed at</b> | <b>Meta-regression variable</b>    | <b>k</b> | <b>Uncorrected coefficient<br/>(95% CI)</b> | <b>Z-value</b> | <b>FDR corrected<br/>p-value</b> |
| Overall bullying <sup>a</sup>                                                                                            | Study endpoint     | Quality                            | 45       | -0.0272 (-0.0542 to -0.0001)                | -1.97          | .23                              |
|                                                                                                                          |                    | Year of publication                | 45       | -0.0048 (-0.0136 to 0.0040)                 | -1.07          | .91                              |
|                                                                                                                          |                    | Mean age                           | 44       | 0.0179 (-0.0038 to 0.0395)                  | 1.62           | ..66                             |
|                                                                                                                          |                    | Mean age (>10 years)               | 44       | 0.0474 (-0.0391 to 0.1338)                  | 1.07           | .92                              |
|                                                                                                                          |                    | Percentage of females              | 38       | 0.0049 (-0.0051 to 0.0151)                  | 0.95           | .92                              |
|                                                                                                                          |                    | Sample size                        | 45       | 0.0000 (-0.0001 to 0.0001)                  | 1.61           | .64                              |
|                                                                                                                          |                    | Sample size (>1000)                | 45       | 0.0181 (-0.0645 to 0.1006)                  | 0.43           | 1.00                             |
|                                                                                                                          |                    | Duration of intervention           | 45       | 0.0006 (-0.0017 to 0.0020)                  | 0.94           | .91                              |
|                                                                                                                          |                    | Duration of intervention (≥1 year) | 45       | 0.0393 (-0.0627 to 0.1412)                  | 0.75           | 1.00                             |
|                                                                                                                          |                    | Universal intervention             | 45       | 0.0230 (-0.1671 to 0.2130)                  | 0.24           | 1.00                             |
|                                                                                                                          | Follow-up          | Quality                            | 21       | 0.0070 (-0.0453 to 0.0593)                  | 0.26           | .96                              |
|                                                                                                                          |                    | Year of publication                | 21       | -0.0030 (-0.0188 to 0.0128)                 | -0.37          | .99                              |
|                                                                                                                          |                    | Mean age                           | 21       | -0.0005 (-0.0268 to 0.0259)                 | -0.03          | 1.00                             |
|                                                                                                                          |                    | Mean age (>10 years)               | 21       | 0.0114 (-0.1337 to 0.1556)                  | 0.15           | .89                              |
|                                                                                                                          |                    | Percentage of females              | 18       | -0.0008 (-0.0014 to 0.0020)                 | -0.55          | .76                              |
|                                                                                                                          |                    | Sample size                        | 21       | 0.0001 (-0.0001 to 0.0002)                  | 2.22           | .18                              |
|                                                                                                                          |                    | Sample size (>1000)                | 21       | 0.1364 (0.0071 to 0.2657)                   | 2.07           | .27                              |
|                                                                                                                          |                    | Duration of intervention           | 20       | 0.0017 (-0.0005 to 0.0039)                  | 1.50           | .64                              |
|                                                                                                                          |                    | Duration of intervention (≥1 year) | 20       | 0.0994 (-0.0648 to 0.2636)                  | 1.19           | .75                              |
|                                                                                                                          |                    | Length of follow-up                | 21       | 0.0001 (-0.0025 to 0.0025)                  | 0.03           | .99                              |
| Universal intervention                                                                                                   | 21                 | 0.0114 (-0.2325 to 0.2098)         | -0.10    | 1.00                                        |                |                                  |
| Bullying perpetration                                                                                                    | Study endpoint     | Quality                            | 35       | -0.0233 (-0.0472 to 0.0005)                 | -1.92          | .21                              |
|                                                                                                                          |                    | Year of publication                | 35       | -0.0033 (-0.0105 to 0.0038)                 | -0.91          | .91                              |

© 2020 American Medical Association. All rights reserved.

|                       |           |                                           |                |                              |       |                              |
|-----------------------|-----------|-------------------------------------------|----------------|------------------------------|-------|------------------------------|
|                       |           | Mean age                                  | 34             | 0.0232 (0.0054 to 0.0410)    | 2.55  | .43                          |
|                       |           | Mean age (>10 years)                      | 34             | 0.0758 (0.0083 to 0.1433)    | 2.20  | .49                          |
|                       |           | Percentage of females                     | 28             | 0.0005 (-0.0096 to 0.0106)   | 0.10  | 1.00                         |
|                       |           | Sample size                               | 35             | 0.0000 (-0.0001 to 0.0001)   | 2.14  | .50                          |
|                       |           | Sample size (>1000)                       | 35             | 0.0127 (-0.0589 to 0.0843)   | 0.35  | .99                          |
|                       |           | Duration of intervention                  | 35             | 0.0005 (-0.0005 to 0.0016)   | 0.95  | .94                          |
|                       |           | Duration of intervention ( $\geq 1$ year) | 35             | 0.0059 (-0.0777 to 0.0895)   | 0.14  | 1.00                         |
|                       |           | Universal intervention                    | 35             | 0.0127 (-0.1725 to 0.1978)   | 0.13  | 1.00                         |
|                       | Follow-up | Quality                                   | 17             | 0.0045 (-0.0582 to 0.0673)   | 0.14  | .95                          |
|                       |           | Year of publication                       | 17             | -0.0002 (-0.0004 to 0.0001)  | -1.67 | .71                          |
|                       |           | Mean age                                  | 17             | 0.0048 (-0.0287 to 0.0383)   | 0.28  | 1.00                         |
|                       |           | Mean age (>10 years)                      | 17             | 0.0078 (-0.1895 to 0.2051)   | 0.08  | 1.00                         |
|                       |           | Percentage of females                     | 14             | -0.0200 (-0.0358 to -0.0043) | -2.99 | .29                          |
|                       |           | Sample size                               | 17             | 0.0001 (-0.0001 to 0.0003)   | 1.61  | .62                          |
|                       |           | Sample size (>1000)                       | 17             | 0.2369 (0.0542 to 0.4195)    | 2.54  | .43                          |
|                       |           | Duration of intervention                  | 16             | 0.0018 (-0.0014 to 0.0051)   | 1.10  | .98                          |
|                       |           | Duration of intervention ( $\geq 1$ year) | 16             | 0.0733 (-0.1670 to 0.3136)   | 0.60  | .99                          |
|                       |           | Length of follow-up                       | 16             | -0.0003 (-0.0036 to 0.0030)  | -0.17 | 1.00                         |
|                       |           | Universal intervention                    | 17             | 0.0302 (-0.3057 to 0.3661)   | 0.18  | 1.00                         |
|                       |           | Bullying exposure                         | Study endpoint | Quality                      | 32    | -0.0510 (-0.0999 to -0.0021) |
| Year of publication   | 32        |                                           |                | 0.0019 (-0.0130 to 0.0169)   | 0.25  | 1.00                         |
| Mean age              | 31        |                                           |                | 0.0196 (-0.0164 to 0.0557)   | 1.07  | .89                          |
| Mean age (>10 years)  | 31        |                                           |                | 0.0374 (-0.1045 to 0.1793)   | 0.52  | .95                          |
| Percentage of females | 27        |                                           |                | 0.0043 (-0.0087 to 0.0173)   | 0.65  | .98                          |
| Sample size           | 27        |                                           |                | 0.0000 (-0.0001 to 0.0001)   | 0.26  | .98                          |

© 2020 American Medical Association. All rights reserved.

|                                    |                |                                           |      |                              |       |      |
|------------------------------------|----------------|-------------------------------------------|------|------------------------------|-------|------|
|                                    |                | Sample size (>1000)                       | 27   | -0.0580 (-0.2271 to 0.1110)  | -0.67 | .99  |
|                                    |                | Duration of intervention                  | 27   | 0.0008 (-0.0019 to 0.0035)   | 0.58  | .94  |
|                                    |                | Duration of intervention ( $\geq 1$ year) | 27   | 0.0947 (-0.1156 to 0.3049)   | 0.88  | .87  |
|                                    |                | Universal intervention                    | 27   | -0.0151 (-0.2833 to 0.2531)  | -0.11 | 1.00 |
|                                    | Follow-up      | Quality                                   | 13   | -0.0206 (-0.0552 to 0.0140)  | -1.17 | .37  |
|                                    |                | Year of publication                       | 12   | -0.0003 (-0.0101 to 0.0094)  | -0.07 | .99  |
|                                    |                | Mean age                                  | 12   | -0.0040 (-0.0241 to 0.0161)  | -0.39 | .83  |
|                                    |                | Mean age (>10 years)                      | 12   | 0.0066 (-0.1247 to 0.1379)   | 0.10  | .98  |
|                                    |                | Percentage of females                     | 12   | -0.0002 (-0.0024 to 0.0020)  | -0.20 | 1.00 |
|                                    |                | Sample size                               | 12   | 0.0000 (-0.0001 to 0.0001)   | 1.41  | .96  |
|                                    |                | Sample size (>1000)                       | 12   | -0.0233 (-0.1329 to 0.0863)  | -0.42 | .89  |
|                                    |                | Duration of intervention                  | 11   | 0.0019 (-0.0012 to 0.0050)   | 1.19  | .95  |
|                                    |                | Duration of intervention ( $\geq 1$ year) | 11   | -0.0022 (-0.2168 to 0.2125)  | -0.02 | .99  |
|                                    |                | Length of follow-up                       | 11   | -0.0003 (-0.0028 to 0.0022)  | -0.25 | .87  |
| Universal intervention             | 13             | 0.0322 (-0.1192 to 0.1835)                | 0.42 | .92                          |       |      |
| Attitudes that discourage bullying | Study endpoint | Quality                                   | 25   | 0.0047 (-0.0328 to 0.0423)   | 0.25  | .92  |
|                                    |                | Year of publication                       | 25   | -0.0015 (-0.0098 to 0.0068)  | -0.36 | .98  |
|                                    |                | Mean age                                  | 23   | -0.0102 (-0.0369 to 0.0165)  | -0.75 | 1.00 |
|                                    |                | Mean age (>10 years)                      | 23   | -0.0109 (-0.1192 to 0.0975)  | -0.20 | 1.00 |
|                                    |                | Percentage of females                     | 18   | -0.0129 (-0.0229 to -0.0029) | -2.53 | .43  |
|                                    |                | Sample size                               | 25   | -0.0001 (-0.0001 to -0.0001) | -1.21 | .90  |
|                                    |                | Sample size (>1000)                       | 25   | -0.0569 (-0.1575 to 0.0438)  | -1.11 | 1.00 |
|                                    |                | Duration of intervention                  | 25   | 0.0003 (-0.0026 to 0.0031)   | 0.17  | 1.00 |
|                                    |                | Duration of intervention ( $\geq 1$ year) | 25   | 0.0312 (-0.1008 to 0.1631)   | 0.46  | .94  |
|                                    |                | Universal intervention                    | 25   | -0.0452 (-0.2420 to 0.1516)  | -0.45 | .93  |

© 2020 American Medical Association. All rights reserved.

|                                   |                        |                                           |                            |                              |       |      |
|-----------------------------------|------------------------|-------------------------------------------|----------------------------|------------------------------|-------|------|
|                                   | Follow-up              | Quality                                   | 14                         | -0.0026 (-0.0589 to 0.0537)  | -0.09 | .98  |
|                                   |                        | Year of publication                       | 14                         | -0.0006 (-0.0111 to 0.0099)  | -0.11 | .99  |
|                                   |                        | Mean age                                  | 14                         | -0.0141 (-0.0364 to 0.0081)  | -1.24 | .95  |
|                                   |                        | Mean age (>10 years)                      | 14                         | -0.0555 (-0.1785 to 0.0676)  | -0.88 | .93  |
|                                   |                        | Percentage of females                     | 8                          | 0.0004 (-0.0024 to 0.0032)   | 0.26  | 1.00 |
|                                   |                        | Sample size                               | 14                         | -0.0002 (-0.0004 to 0.0001)  | -1.78 | .62  |
|                                   |                        | Sample size (>1000)                       | 14                         | -0.1163 (-0.2288 to -0.0038) | -2.03 | .56  |
|                                   |                        | Duration of intervention                  | 13                         | 0.0006 (-0.0015 to 0.0027)   | 0.54  | .96  |
|                                   |                        | Duration of intervention ( $\geq 1$ year) | 13                         | 0.0561 (-0.0998 to 0.2119)   | 0.70  | .97  |
|                                   |                        | Length of follow-up                       | 14                         | -0.0018 (-0.0040 to 0.0004)  | -1.64 | .72  |
|                                   |                        | Universal intervention                    | 14                         | -0.1328 (-0.3422 to 0.0766)  | -1.24 | .93  |
| Attitudes that encourage bullying | Study endpoint         | Quality                                   | 15                         | 0.1060 (0.0242 to 0.1878)    | 2.54  | .18  |
|                                   |                        | Year of publication                       | 15                         | 0.0141 (-0.0137 to 0.0420)   | 0.99  | .93  |
|                                   |                        | Mean age                                  | 14                         | -0.0654 (-0.1578 to 0.0270)  | -1.39 | .83  |
|                                   |                        | Mean age (>10 years)                      | 14                         | 0.0555 (-0.2321 to 0.3431)   | 0.38  | .98  |
|                                   |                        | Percentage of females                     | 13                         | 0.0269 (-0.0097 to 0.0635)   | 1.44  | .81  |
|                                   |                        | Sample size                               | 15                         | 0.0000 (-0.0001 to 0.0001)   | -0.58 | .98  |
|                                   |                        | Sample size (>1000)                       | 15                         | -0.1364 (-0.3752 to 0.1024)  | -1.12 | 1.00 |
|                                   |                        | Duration of intervention                  | 15                         | -0.0017 (-0.0089 to 0.0054)  | -0.48 | .94  |
|                                   |                        | Duration of intervention ( $\geq 1$ year) | 15                         | -0.1008 (-0.4554 to 0.2539)  | -0.56 | .97  |
|                                   | Universal intervention | 15                                        | -0.0470 (-.5808 to 0.4869) | -0.17                        | 1.00  |      |
|                                   | Follow-up              | Quality                                   | 7                          | 0.0014 (-0.1045 to 0.1072)   | 0.03  | .99  |
|                                   |                        | Year of publication                       | 7                          | 0.0114 (-0.0119 to 0.0347)   | 0.96  | .94  |
|                                   |                        | Mean age                                  | 7                          | 0.0173 (-0.0248 to 0.0594)   | 0.80  | .97  |
|                                   |                        | Mean age (>10 years)                      | 7                          | 0.1257 (-0.0257 to 0.2772)   | 1.63  | .68  |

© 2020 American Medical Association. All rights reserved.



|                            |                        |                                    |                            |                             |       |      |
|----------------------------|------------------------|------------------------------------|----------------------------|-----------------------------|-------|------|
|                            |                        | Percentage of females              | 6                          | -0.0003 (-0.0033 to 0.0027) | -0.19 | 1.00 |
|                            |                        | Sample size                        | 7                          | 0.0001 (-0.0002 to 0.0003)  | 0.58  | .98  |
|                            |                        | Sample size (>1000)                | 7                          | 0.0255 (-0.1351 to 0.1860)  | 0.31  | 1.00 |
|                            |                        | Duration of intervention           | 6                          | -0.0010 (-0.0048 to 0.0027) | -0.54 | .96  |
|                            |                        | Duration of intervention (≥1 year) | 6                          | -0.0813 (-0.3298 to 0.1672) | -0.64 | 1.00 |
|                            |                        | Length of follow-up                | 7                          | -0.0019 (-0.0055 to 0.0017) | -1.04 | .91  |
|                            |                        | Universal intervention             | 7                          | -0.0161 (-0.2113 to 0.1791) | -0.16 | 1.00 |
| Cyberbullying <sup>c</sup> | Study endpoint         | Quality                            | 5                          | 0.0053 (-0.0627 to 0.0734)  | 0.15  | .95  |
|                            |                        | Year of publication                | 5                          | -0.0318 (-0.0916 to 0.0280) | -1.04 | .82  |
|                            |                        | Mean age                           | 5                          | 0.0366 (-0.0683 to 0.1415)  | 0.68  | .91  |
|                            |                        | Mean age (>10 years)               | 5 <sup>b</sup>             | N/A                         | N/A   | N/A  |
|                            |                        | Percentage of females              | 5                          | -0.0028 (-0.0405 to 0.0348) | -0.15 | 1.00 |
|                            |                        | Sample size                        | 5                          | 0.0001 (0.0001 to 0.0003)   | 2.01  | .39  |
|                            |                        | Sample size (>1000)                | 5                          | 0.1305 (-0.0065 to 0.2474)  | 1.86  | .54  |
|                            |                        | Duration of intervention           | 5                          | 0.0023 (0.0001 to 0.0045)   | 2.06  | .41  |
|                            |                        | Duration of intervention (≥1 year) | 5                          | 0.1045 (-0.0022 to 0.2113)  | 1.92  | .56  |
|                            | Universal intervention | 5                                  | 0.1897 (-0.6726 to 1.0521) | 0.43                        | .96   |      |
|                            | Follow-up              | Quality                            | <4                         | N/A                         | N/A   | N/A  |
|                            |                        | Year of publication                | <4                         | N/A                         | N/A   | N/A  |
|                            |                        | Mean age                           | <4                         | N/A                         | N/A   | N/A  |
|                            |                        | Mean age (>10 years)               | <4                         | N/A                         | N/A   | N/A  |
|                            |                        | Percentage of females              | <4                         | N/A                         | N/A   | N/A  |
|                            |                        | Sample size                        | <4                         | N/A                         | N/A   | N/A  |
|                            |                        | Sample size (>1000)                | <4                         | N/A                         | N/A   | N/A  |
| Duration of intervention   |                        | <4                                 | N/A                        | N/A                         | N/A   |      |

© 2020 American Medical Association. All rights reserved.

|                        |                |                                           |      |                             |       |      |
|------------------------|----------------|-------------------------------------------|------|-----------------------------|-------|------|
|                        |                | Duration of intervention ( $\geq 1$ year) | <4   | N/A                         | N/A   | N/A  |
|                        |                | Length of follow-up                       | <4   | N/A                         | N/A   | N/A  |
|                        |                | Universal intervention                    | <4   | N/A                         | N/A   | N/A  |
| Mental health problems | Study endpoint | Quality                                   | 18   | 0.0442 (-0.0178 to 0.1062)  | 1.40  | .60  |
|                        |                | Year of publication                       | 18   | 0.0040 (-0.0154 to 0.0233)  | 0.40  | .97  |
|                        |                | Mean age                                  | 18   | -0.0203 (-0.0604 to 0.0199) | -0.99 | 0.71 |
|                        |                | Mean age (>10 years)                      | 18   | 0.0078 (-0.1621 to 0.1778)  | 0.09  | 1.00 |
|                        |                | Percentage of females                     | 18   | 0.0046 (-0.0101 to 0.0192)  | 0.61  | .88  |
|                        |                | Sample size                               | 18   | 0.0001 (0.0000 to 0.0001)   | 2.41  | .16  |
|                        |                | Sample size (>1000)                       | 18   | 0.1765 (0.0166 to 0.3665)   | 2.16  | .17  |
|                        |                | Duration of intervention                  | 18   | 0.0022 (-0.0002 to 0.0045)  | 1.82  | .57  |
|                        |                | Duration of intervention ( $\geq 1$ year) | 18   | 0.1571 (-0.0938 to 0.4080)  | 1.23  | .91  |
|                        |                | Universal intervention                    | 18   | -0.0580 (-0.2853 to 0.1693) | -0.50 | .93  |
|                        | Follow-up      | Quality                                   | 6    | -0.0817 (-0.1907 to 0.0272) | -1.47 | .75  |
|                        |                | Year of publication                       | 6    | 0.0011 (-0.0353 to 0.0375)  | 0.06  | .99  |
|                        |                | Mean age                                  | 6    | -0.0322 (-0.1212 to 0.0567) | -0.71 | .99  |
|                        |                | Mean age (>10 years)                      | 6    | 0.1009 (-0.3035 to 0.5053)  | 0.49  | .94  |
|                        |                | Percentage of females                     | 6    | 0.0185 (-0.0233 to 0.0603)  | 0.87  | .94  |
|                        |                | Sample size                               | 6    | 0.0003 (-0.0003 to 0.0008)  | 0.85  | .94  |
|                        |                | Sample size (>1000)                       | 6    | 0.1398 (-0.4217 to 0.7013)  | 0.49  | .95  |
|                        |                | Duration of intervention                  | 5    | -0.0004 (-0.0139 to 0.0131) | -0.06 | .99  |
|                        |                | Duration of intervention ( $\geq 1$ year) | 5    | -0.0384 (-0.6240 to 0.5473) | -0.13 | 1.00 |
|                        |                | Length of follow-up                       | 6    | -0.0002 (-0.0084 to 0.0079) | -0.06 | .99  |
| Universal intervention | 6              | 0.1364 (-0.3514 to 0.6242)                | 0.55 | .97                         |       |      |
| School climate         |                | Quality                                   | 12   | 0.0085 (-0.0066 to 0.0236)  | 1.11  | .68  |

© 2020 American Medical Association. All rights reserved.

|  |                |                                    |    |                             |       |      |
|--|----------------|------------------------------------|----|-----------------------------|-------|------|
|  | Study endpoint | Year of publication                | 12 | -0.0018 (-0.0070 to 0.0034) | -0.67 | 1.00 |
|  |                | Mean age                           | 12 | -0.0077 (-0.0211 to 0.0056) | -1.14 | .99  |
|  |                | Mean age (>10 years)               | 12 | -0.0574 (-0.1263 to 0.0116) | -1.63 | .70  |
|  |                | Percentage of females              | 12 | -0.0022 (-0.0088 to 0.0043) | -0.66 | 1.00 |
|  |                | Sample size                        | 12 | -0.0001 (-0.0001 to 0.0001) | -0.99 | .92  |
|  |                | Sample size (>1000)                | 12 | -0.0626 (-0.1353 to 0.0101) | -1.69 | .72  |
|  |                | Duration of intervention           | 12 | -0.0003 (-0.0008 to 0.0003) | -1.01 | .92  |
|  |                | Duration of intervention (≥1 year) | 12 | -0.0242 (-0.0861 to 0.0378) | -0.76 | 1.00 |
|  |                | Universal intervention             | 12 | -0.0611 (-0.1783 to 0.0561) | -1.02 | .92  |
|  | Follow-up      | Quality                            | 5  | 0.1044 (-0.0830 to 0.2917)  | 1.09  | .47  |
|  |                | Year of publication                | 5  | -0.0086 (-0.0350 to 0.0178) | -0.64 | 1.00 |
|  |                | Mean age                           | 5  | 0.0194 (-0.0270 to 0.0659)  | 0.82  | .97  |
|  |                | Mean age (>10 years)               | 5  | 0.0149 (-0.2144 to 0.2442)  | 0.13  | 1.00 |
|  |                | Percentage of females              | 5  | 0.0017 (-0.0010 to 0.0045)  | 1.22  | .94  |
|  |                | Sample size                        | 5  | -0.0001 (-0.0004 to 0.0002) | -0.62 | 1.00 |
|  |                | Sample size (>1000)                | 5  | 0.0149 (-0.2144 to 0.2442)  | 0.13  | 1.00 |
|  |                | Duration of intervention           | 5  | -0.0035 (-0.0083 to 0.0013) | -1.41 | .82  |
|  |                | Duration of intervention (≥1 year) | 5  | -0.1124 (-0.3829 to 0.1580) | -0.81 | .96  |
|  |                | Length of follow-up                | 5  | 0.0040 (-0.0032 to 0.0112)  | 1.09  | .96  |
|  |                | Universal intervention             | 5  | -0.0857 (-0.359 to 0.188)   | -0.61 | 1.00 |

a. Overall bullying is a pooled measure including traditional bullying perpetration, traditional bullying exposure, and cyberbullying.

b. Only one category; not possible to conduct this meta-regression.

c. Cyberbullying reports pooled cyberbullying perpetration and cyberbullying exposure data.

Abbreviations: CI, confidence interval; FSN, fail safe number; k, number of samples; N/A, not applicable.

## eReferences.

1. Jiménez-Barbero JA, Ruiz-Hernández JA, Llor-Zaragoza L, Pérez-García M, Llor-Esteban B. Effectiveness of anti-bullying school programs: a meta-analysis. *Children and Youth Services Review*. 2016;61:165-175.
2. Silva JLD, Oliveira WA, Mello FCM, Andrade LS, Bazon MR, Silva MAI. Anti-bullying interventions in schools: a systematic literature review. *Cien Saude Colet*. Jul 2017;22(7):2329-2340.
3. Borenstein M, Hedges L, Higgins J, Rothstein H. *Comprehensive Meta-Analysis Version 2*. Englewood, NJ, USA: Biostat; 2005.
4. Cohen J. *Statistical power analysis for the behavioral sciences* (2nd ed.). Hillsdale, NJ: Lawrence Earlbaum Associates; 1988.
5. Follmann D, Elliott P, Suh I, Cutler J. Variance imputation for overviews of clinical trials with continuous response. *J Clin Epidemiol*. Jul 1992;45(7):769-773.
6. Azzolina D, Baldi I, Minto C, Bottigliengo D, Lorenzoni G, Gregori D. Handling missing continuous outcome data in a Bayesian network meta-analysis.
7. Borenstein M, Hedges L, Higgins J, Rothstein H. *Introduction to Meta-analysis*. Chichester: John Wiley and Sons; 2009.
8. Sterne J. *Meta-Analysis in Stata: An Updated Collection From the Stata Journal*. College Station, TX: Stata Press; 2009.
9. Lipsey M, Wilson D. *Practical Meta-analysis*. Thousand Oaks, CA: Sage Publications; 2000.
10. Guyatt GH, Oxman AD, Kunz R, Woodcock J, Brozek J, Helfand M, Alonso-Coello P, Glasziou P, Jaeschke R, Akl EA, Norris S, Vist G, Dahm P, Shukla VK, Higgins J, Falck-Ytter Y, Schünemann HJ; GRADE Working Group. GRADE guidelines: 7. Rating the quality of evidence--inconsistency. *J Clin Epidemiol*. Dec 2011;64(12):1294-1302.
11. Orwin RG. A fail-safe N for effect size in meta-analysis. *J Edu Stat*. 1983;8:157-159.
12. Egger M, Davey Smith G, Schneider M, Minder C. Bias in meta-analysis detected by a simple, graphical test. *BMJ*. Sep 13 1997;315(7109):629-634.
13. Gaffney H, Farrington DP, Ttofi MM. Examining the Effectiveness of School-Bullying Intervention Programs Globally: a Meta-analysis. *Int Journal of Bullying Prevention* 2019;1(1):14-31.
14. Furukawa TA, Leucht S. How to obtain NNT from Cohen's d: comparison of two methods. *PLoS One*. Apr 27 2011;6(4):e19070.
15. Perez L, Kunzli N. From measures of effects to measures of potential impact. *Int J Public Health*. 2009;54(1):45-48.

16. Bjerre LM, LeLorier J. Expressing the magnitude of adverse effects in case-control studies: "the number of patients needed to be treated for one additional patient to be harmed". *BMJ*. Feb 19 2000;320(7233):503-506.
17. Athanasiades C, Kamariotis H, Psalti A, Baldry AC, Sorrentino A. Internet use and cyberbullying among adolescent students in Greece: The "TABBY" project. *Hellenic Journal of Psychology*. 2015;12:14-39.
18. Baldry AC, Farrington DP. Evaluation of an Intervention Program for the Reduction of Bullying and Victimization in Schools. *Aggressive Behavior*. 2004;30:1-15.
19. Bonell C, Allen E, Warren E, McGowan J, Bevilacqua L, Jamal F. Effects of the Learning Together Intervention on Bullying and Aggression in English Secondary Schools (INCLUSIVE): A Cluster Randomised Controlled Trial. *Lancet*. 2018;392(10163):2452-2464.
20. Boulton MJ, Flemington I. The Effects of a Short Video Intervention on Secondary School Pupils' Involvement in Definitions of and Attitudes towards Bullying. *School Psychology International*. 1996;17:331.
21. Bowes L, Aryani F, Ohan F, Haryanti RH, Winarna S, Arsianto Y, Budiawati H, Widowati E, Saraswati R, Kristianto Y, Erma Suryani Y, Fahrizal Ulum D, Minnick E. The Development and Pilot Testing of an Adolescent Bullying Intervention in Indonesia - The ROOTS Indonesia Program. *Global Health Action*. 2019;12(1):e1656905.
22. Brown EC, Low S, Smith BH, Haggerty KP. Outcomes from a School-Randomized Controlled Trial of Steps to Respect: A Bullying Prevention Program. *School Psychology Review*. 2011;40 (3): 423-433.
23. Connolly J, Josephson W, Schnoll J, Simkins-Strong E, Pepler D, MacPherson A, Weiser J, Moran M, Jiang D. Evaluation of a Youth- Led Program for Preventing Bullying, Sexual Harassment, and Dating Aggression in Middle Schools. *Journal of Early Adolescence*. 2015;35(3):403-434.
24. Conduct Problems Prevention Research Group. The Effects of a Multiyear Universal Social–Emotional Learning Program: The Role of Student and School Characteristics. *Journal of Consulting and Clinical Psychology*. 2010;78(2):156-168.
25. Crean HF, Johnson DB. Promoting Alternative Thinking Strategies (PATHS) and Elementary School Aged Children's Aggression: Results From a Cluster Randomized Trial. *American Journal of Community Psychology*. 2013;52(1-2):56-72.
26. Cross D, Shaw T, Hadwen K, Cardoso P, Slee P, Roberts C, Thomas L, Barnes A. Longitudinal Impact of the Cyber Friendly Schools Program on Adolescents' Cyberbullying Behavior. *Aggressive Behavior*. 2016;42:166-180.
27. DeRosier ME. Building Relationships and Combating Bullying: Effectiveness of a School-Based Social Skills Group Intervention. *Journal of Clinical Child & Adolescent Psychology*. 2004; 33(1):196-201.

28. Espelage DL, Low S, Polanin JR, Brown EC. The Impact of a Middle School Program to Reduce Aggression, Victimization, and Sexual Violence. *Journal of Adolescent Health*. 2013;53(2):180-6.
29. Espelage DL, Rose CA, Polanin JR. Social-Emotional Learning Program to Reduce Bullying, Fighting, and Victimization Among Middle School Students With Disabilities. *Remedial and Special Education*. 2015; 36(5):299-311.
30. Farmer VL, Williams SM, Mann JI, Schofield G, McPhee JC, Taylor RW. Change of School Playground Environment on Bullying: A Randomized Controlled Trial. *Pediatrics*. 2017;139(5):e20163072.
31. Fekkes M, Pijpers FIM, Verloove-Vanhorick SP. Effects of Antibullying School Program on Bullying and Health Complaints. *Archives of Pediatrics and Adolescent Medicine*. 2006;160(6):638-44.
32. Fonagy P, Twemlow SW, Vernberg EM, Nelson JM, Dill EJ, Little TD, Sargent JA. A Cluster Randomized Controlled Trial of Child-Focused Psychiatric Consultation and a School Systems-Focused Intervention to Reduce Aggression. *Journal of Child Psychology and Psychiatry*. 2009;50(5):607-16.
33. Frey KS, Snell JL, Van Schoiack Edstrom L, MacKenzie EP, Broderick CJ. Reducing Playground Bullying and Supporting Beliefs: An Experimental Trial of the Steps to Respect Program. *Developmental Psychology Journal*. 2005;41(3):479-90.
34. Giannotta F, Settanni M, Kliewer W, Ciairano S. Results of an Italian School-Based Expressive Writing Intervention Trial Focused on Peer Problems. *Journal of Adolescence*. 2009; 32(6):1377-89.
35. Gradinger P, Yanagida T, Strohmeier D, Spiel C. Prevention of Cyberbullying and Cyber Victimization: Evaluation of the ViSC Social Competence Program. *Journal of School Violence*. 2015;14 (1): 87-110.
36. Green JG, Holt MK, Oblath R, Robinson E, Storey K, Merrin GJ. Engaging Professional Sports to Reduce Bullying: An Evaluation of the Boston vs. Bullies Program. *Journal of School Violence*. 2020.
37. Gusmões J, Sañudo A, Valente JY, Sanchez ZM. Violence in Brazilian Schools: Analysis of the Effect of the #Tamojunto Prevention Program for Bullying and Physical Violence. *Journal of Adolescence*. 2018;63:107-117.
38. Holen S, Waaktaar T, Lervåg A, Ystgaard M. Implementing a Universal Stress Management Program for Young School Children: Are there Classroom Climate or Academic Effects? *Scandinavian Journal of Educational Research*. 2013;57(4):420-444.
39. Hormazabal-Aguayo I, Fernández-Vergara O, González-Calderón N, Vicencio-Rojas F, Russell-Guzmán J, Chacana-Cañas, C, Del Pozo-Cruz B, García-Hermoso A. Can a Before-School Physical Activity Program Decrease Bullying Victimization in Disadvantaged Children? The Active-Start Study. *International Journal of Clinical and Health Psychology*. 2019;19(3):237-242.

© 2020 American Medical Association. All rights reserved.

40. Hunt C. The Effect of an Education Program on Attitudes and Beliefs about Bullying and Bullying Behaviour in Junior Secondary School Students. *Child and Adolescent Mental Health*. 2007;12(1):21-26.
41. Ju Y, Wang S, Zhang W. Intervention research on school bullying in primary schools. *Front. Educ China*. 2009; 4(1):111-122.
42. Kaljee L, Zhang L, Langhaug L, Munjile K, Tembo S, Menon A, Stanton B, Li X, Malungo J. A Randomized-Control Trial for the Teachers' Diploma Programme on Psychosocial Care, Support and Protection in Zambian Government Primary Schools. *Psychology, Health & Medicine*. 2017; 22(4):381-392.
43. Kärnä A, Voeten M, Little TD, Poskiparta E, Kaljonen A, Salmivalli C. A Large-Scale Evaluation of the KiVa Antibullying Program: Grades 4-6. *Child Development journal*. 2011;82(1):311-30.
44. Kärnä A, Voeten M, Little TD, Alanen E, Poskiparta E, Salmivalli C. Effectiveness of the KiVa Antibullying Program: Grades 1–3 and 7–9. *Journal of Educational Psychology*. 2013;105(2):535–551.
45. Knowler C, Frederickson N. Effects of an Emotional Literacy Intervention for Students Identified With Bullying Behaviour. *Educational Psychology*. 2013;33(7):862-883.
46. Meraviglia MG, Becker H, Rosenbluth B, Sanchez E, Robertson T. The Expect Respect Project. Creating a Positive Elementary School Climate. *Journal Interpers Violence*. 2003;18(11):1347-1360.
47. Mithassel UV, Bru E, Idsoe T. Is the sustainability of reduction in bullying related to follow-up procedures? *Journal Educational Psychology*. 2008;28 (1):83-95.
48. Nocentini A, Menesini E. KiVa Anti-Bullying Program in Italy: Evidence of Effectiveness in a Randomized Control Trial. *Prevention Science*. 2016;17(8):1012-1023.
49. Nocentini A, Menesini E, Pluess M. The Personality Trait of Environmental Sensitivity Predicts Children's Positive Response to School-Based Antibullying Intervention. *Clinical Psychological Science*. 2018;1-12.
50. Ostrov JM, Godleski SA, Kamper-DeMarco KE, Blakely-McClure SJ, Celenza. Replication and Extension of the Early Childhood Friendship Project: Effects on Physical and Relational Bullying. *School Psychology Review*. 2015; 44(4):445-463.
51. Sanchez E, Robertson TR, Lewis CM, Rosenbluth B, Bohman T, Casey DM. Preventing Bullying and Sexual Harassment in Elementary Schools The Expect Respect Model. *Journal of Emotional Abuse*. 2001;2 (2-3):157-180.
52. Santos RG, Chartier MJ, Whalen JC, Chateau D, Boyd L. Effectiveness of School-Based Violence Prevention for Children and Youth: A Research Report. *Healthcare quarterly*. 2011;14 (2):80-91.

53. Sorrentino A, Baldry AC, Farrington DP. The Efficacy of the Tabby Improved Prevention and Intervention Program in Reducing Cyberbullying and Cybervictimization Among Students. *International Journal of Environmental Research and Public Health*. 2018;15(11):2536.
54. Tanrikulu T, Kınay H, Arıcak OT. Sensibility development program against cyberbullying. *New Media and Society*. 2015;17(5):708-719.
55. Trip S, Bora C, Sipos-Gug S, Tocai I, Gradinger P, Yanagida T, Strohmeier D. Bullying Prevention in Schools by Targeting Cognitions, Emotions, and Behavior: Evaluating the Effectiveness of the REBE-ViSC Program. *Journal of Counseling Psychology*. 2015; 62(4):732-40.
56. Tsiantis ACJ, Beratis IN, Syngelaki EM, Stefanakou AA, Asimopoulos C, Sideridis GD. The Effects of a Clinical Prevention Program on Bullying, Victimization, and Attitudes toward School of Elementary School Students. *Behavioral Disorders*. 2013;38(4):243-257.
57. van den Berg YHM, Segers E, Cillessen AHN. Changing Peer Perceptions and Victimization Through Classroom Arrangements: A Field Experiment. *Journal of Abnormal Child Psychology*. 2012;40(3):403-12.
58. Yan H, Chen J, Huang J. School Bullying Among Left-Behind Children: The Efficacy of Art Therapy on Reducing Bullying Victimization. *Frontiers in Psychiatry*. 2019;10(40):1-7.
59. Boulton MJ, Boulton L. Modifying Self-Blame, Self-Esteem, and Disclosure Through a Cooperative Cross-Age Teaching Intervention for Bullying Among Adolescents. *Violence and Victims*. 2017;32(4):609-626.
60. Espelage DL, Rose CA, Polanin JR. Social-Emotional Learning Program to Promote Prosocial and Academic Skills Among Middle School Students With Disabilities. *Remedial and Special Education*. 2016;1-10.
61. Mallick R, Kathard H, Borhan A, Pillay M, Thabane L. A Cluster Randomised Trial of a Classroom Communication Resource Program to Change Peer Attitudes Towards Children Who Stutter Among Grade 7 Students. *Trial*. 2018;19(1), 664.
62. Moore B, Woodcock S, Dudley D. Developing Wellbeing Through a Randomised Controlled Trial of a Martial Arts Based Intervention: An Alternative to the Anti-Bullying Approach. *International Journal of Environmental Research and Public Health*. 2018;16(1):81-99.
63. Schechtman Z, Ifargan M. School-based Integrated and Segregated Interventions to Reduce Aggression. *Aggressive Behavior*. 2009; 35(4):342-56.
64. Yeager DS, Trzesniewski KH, Dweck CS. An Implicit Theories of Personality Intervention Reduces Adolescent Aggression in Response to Victimization and Exclusion. *Child Development*. 2012; 84 (3):970-988.
65. Barkoukis V, Lazuras L, Ourda D, Tsorbatzoudis H. Psychosocial Risk Factors for Adolescent Cyberbullying: Evidence From a School-Based Intervention. *Aggressive Behavior*. 2016;42:114-122.



66. Bonell C, Allen E, Opondo C, Warren E, Elbourne DR, Sturgess, J, Bevilacqua L, McGowan J, Mathiot A, Viner RM. Examining Intervention Mechanisms of Action Using Mediation Analysis Within a Randomised Trial of a Whole-School Health Intervention. *Journal of Epidemiology and Community Health*. 2019;73(5):455-464.
67. Calvete E, Orue I, Fernández-González L, Prieto-Fidalgo A. Effects of an Incremental Theory of Personality Intervention on the Reciprocity Between Bullying and Cyberbullying Victimization and Perpetration in Adolescents. *PLoS One*. 2019;14(11):e0224755.
68. Cappella E, Hamre BK, Yeon Kim H, Henry DB, Frazier SL, Atkins MS, Schoenwald SK. Teacher Consultation and Coaching Within Mental Health Practice: Classroom and Child Effects in Urban Elementary Schools. *Journal of Consulting and Clinical Psychology*. 2012;80(4):597-610.
69. Chen LM, Sung YH, Cheng W. How to Enhance Teachers' Bullying Identification: A Comparison Among Providing a Training Program, a Written Definition, and a Definition with a Checklist of Bullying Characteristics. *Asia-Pacific Education Researcher*. 2017; 26(6):351-359.
70. Cross D, Monks H, Hall M, Shaw T, Pintabona Y, Erceg E, Hamilton GJ, Roberts C, Waters S, Lester L. Three-year results of the Friendly Schools whole-of-school intervention on children's bullying behaviour. *British Educational Research Journal*. 2011; 37(1):105-129.
71. DeRosier ME, Marcus SR. Building Friendships and Combating Bullying: Effectiveness of S.S.GRIN at One-Year Follow-Up. *Journal of Clinical Child & Adolescent Psychology*. 2005;34(1):140-50.
72. DeSmet A, Bastiaensens S, Van Cleemput K, Poels K, Vandebosch H, Deboutte G, Herrewijn L, Malliet S, Pabian S, Van Broeckhoven F, De Troyer O, Deglorie G, Van Hoecke S, Samyn K, De Bourdeaudhuij I. The efficacy of the Friendly Attac serious digital game to promote prosocial bystander behavior in cyberbullying among Young adolescents: A cluster-randomized controlled trial. *Computers in Human Behavior*. 2018;78:336-347.
73. Jenson JM, Brisson D, Bender KA, Williford AP. Effects of the Youth Matters Prevention Program on Patterns of Bullying and Victimization in Elementary and Middle School. *Social Work Research*. 2013;37(4):361-372.
74. Karasimopoulou S, Derri V, Zervoudaki E. Children's Perceptions About Their Health-Related Quality of Life: Effects of a Health Education-Social Skills Program. *Health Educ Research*. 2012;27(5):780-93.
75. Kathard H, Walters F, Frieslaar, K, Mhlongo T, Rhooide, M, Shaboodien, R, Weidmann J, Zimmerman N, Zoetmulder A, Camroodien-Surve F. Classroom Intervention to Change Peers' Attitudes Towards Children Who Stutter: A Feasibility Study. *South African Journal of Communication Disorders*. 2014; 61(1).

76. Meyer N, Lesch E. An analysis of the limitations of a behavioural programme for bullying boys from a subeconomic environment. *Southern African Journal of Child and Adolescent Mental Health*. 2000; 12(1):59-6.
77. Muñoz-Fernández N, Ortega-Rivera J, Nocentini A, Menesini E, Sánchez-Jiménez V. The Efficacy of the "Dat-e Adolescence" Prevention Program in the Reduction of Dating Violence and Bullying. *International Journal of Environmental Research and Public Health*. 2019; 16(3), 408-429.
78. Naidoo S, Satorius BK, De Vries H, Taylor M. Verbal Bullying Changes Among Students Following an Educational Intervention Using the Integrated Model for Behavior Change. *Journal of School Health*. 2016; 86(11):813-822.
79. Nieh HP, Wu WC. Effects of a Collaborative Board Game on Bullying Intervention: A Group-Randomized Controlled Trial. *Journal of School Health*. 2018;88(10):725-733.
80. Pfetsch J, Schultze-Krumbholz A, Füllgraf, F. Does the Information about Classroom Norms Change the Individual Injunctive Norms about Cyberbullying? – A Minimal Intervention Study. *International Journal of Developmental Science*. 2018;1(2):1-11.
81. Shams H, Garmaroudi G, Nedjat S, Yekaninejad MS. Effect of Education Based on Socio-Ecological Theory on Bullying in Students: An Educational Study. *Electronic Physician Journal*. 2018; 10(7):7046-7053.
82. Stelko-Pereira AC, Williams LC. Evaluation of a Brazilian School Violence Prevention Program (Violência Nota Zero). *Pensamiento Psicológico*. 2016;14(1):63-76.
83. Stevens V, De Bourdeaudhuij I, Van Oost P. Bullying in Flemish Schools: An Evaluation of Anti-Bullying Intervention in Primary and Secondary Schools. *British Journal of Educational Psychology*. 2000; 70(2), 195-210.
84. Swaim RC, Kelly K. Efficacy of a Randomized Trial of a Community and School-Based Anti-Violence Media Intervention Among Small-Town Middle School Youth. *Prevention Sciences*. 2008;9(3):202-214.
85. Wójcik M, Hełka AM. Meeting the Needs of Young Adolescents: ABBL Anti-Bullying Program During Middle School Transition. *Psychological Reports*. 2018;122(3):1043-1067.
